# Supplementary material for: Association between allostatic load and mortality among Chinese older adults: the Chinese Longitudinal Health and Longevity Study
Source: PubMed Central journal article supplement — BMJ Open. 2021 Aug 3;11(8):e045369. doi: 10.1136/bmjopen-2020-045369 (PMC8336121; doi:10.1136/bmjopen-2020-045369), 2021-08-03
Supplement: bmjopen-2020-045369.draft_revisions.pdf [file bmjopen-2020-045369.draft_revisions.pdf]

# BMJ Open

BMJ Open is committed to open peer review. As part of this commitment we make the peer review history of every article we publish publicly available.

When an article is published we post the peer reviewers' comments and the authors' responses online. We also post the versions of the paper that were used during peer review. These are the versions that the peer review comments apply to.

The versions of the paper that follow are the versions that were submitted during the peer review process. They are not the versions of record or the final published versions. They should not be cited or distributed as the published version of this manuscript.

BMJ Open is an open access journal and the full, final, typeset and author-corrected version of record of the manuscript is available on our site with no access controls, subscription charges or pay-per-view fees (<http://bmjopen.bmj.com>).

If you have any questions on BMJ Open's open peer review process please email [info.bmjopen@bmj.com](mailto:info.bmjopen@bmj.com)

# BMJ Open

## The Association between Allostatic Load and Mortality among Chinese Older Adults: The Chinese Longitudinal Health and Longevity Study

|                               |                                                                                                                                                                                                                                                                                                                                                                                                                                            |
|-------------------------------|--------------------------------------------------------------------------------------------------------------------------------------------------------------------------------------------------------------------------------------------------------------------------------------------------------------------------------------------------------------------------------------------------------------------------------------------|
| Journal:                      | <i>BMJ Open</i>                                                                                                                                                                                                                                                                                                                                                                                                                            |
| Manuscript ID                 | bmjopen-2020-045369                                                                                                                                                                                                                                                                                                                                                                                                                        |
| Article Type:                 | Original research                                                                                                                                                                                                                                                                                                                                                                                                                          |
| Date Submitted by the Author: | 01-Oct-2020                                                                                                                                                                                                                                                                                                                                                                                                                                |
| Complete List of Authors:     | Zhang, Tianhang; Duke Kunshan University, Global Health Research Center; Imperial College London<br>Yan, Lijing L; Duke Kunshan University, Global Health Research Center; Duke Global Health Institute<br>Chen, Hua-Shuai; Duke University,<br>Jin, Hai-Yu; Duke Kunshan University, Global Health Research Center<br>wu, chen kai; Duke Kunshan University, Global Health Research Center; Duke University, Duke Global Health Institute |
| Keywords:                     | MENTAL HEALTH, PUBLIC HEALTH, EPIDEMIOLOGY                                                                                                                                                                                                                                                                                                                                                                                                 |
|                               |                                                                                                                                                                                                                                                                                                                                                                                                                                            |

SCHOLARONE™  
Manuscripts

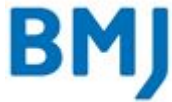

I, the Submitting Author has the right to grant and does grant on behalf of all authors of the Work (as defined in the below author licence), an exclusive licence and/or a non-exclusive licence for contributions from authors who are: i) UK Crown employees; ii) where BMJ has agreed a CC-BY licence shall apply, and/or iii) in accordance with the terms applicable for US Federal Government officers or employees acting as part of their official duties; on a worldwide, perpetual, irrevocable, royalty-free basis to BMJ Publishing Group Ltd ("BMJ") its licensees and where the relevant Journal is co-owned by BMJ to the co-owners of the Journal, to publish the Work in this journal and any other BMJ products and to exploit all rights, as set out in our [licence](#).

The Submitting Author accepts and understands that any supply made under these terms is made by BMJ to the Submitting Author unless you are acting as an employee on behalf of your employer or a postgraduate student of an affiliated institution which is paying any applicable article publishing charge ("APC") for Open Access articles. Where the Submitting Author wishes to make the Work available on an Open Access basis (and intends to pay the relevant APC), the terms of reuse of such Open Access shall be governed by a Creative Commons licence – details of these licences and which [Creative Commons](#) licence will apply to this Work are set out in our licence referred to above.

Other than as permitted in any relevant BMJ Author's Self Archiving Policies, I confirm this Work has not been accepted for publication elsewhere, is not being considered for publication elsewhere and does not duplicate material already published. I confirm all authors consent to publication of this Work and authorise the granting of this licence.

1  
2  
3 **The Association between Allostatic Load and Mortality among Chinese Older Adults:**  
4  
5 **The Chinese Longitudinal Health and Longevity Study**  
6  
7  
8  
9

10 Tianhang Zhang (MSc.)<sup>1,2</sup>, Lijing L. Yan (PhD, Prof.)<sup>1,3</sup>, Huashuai Chen (PhD, Dr.)<sup>4</sup>, Hai-Yu  
11  
12 Jin (MA)<sup>1</sup>, Chenkai Wu (PhD, Prof, Assistant.)<sup>1,3</sup>  
13  
14  
15  
16

17 <sup>1</sup> Global Health Research Center, Duke Kunshan University, Jiangsu, China, <sup>2</sup>Imperial  
18 College London, United Kingdom, <sup>3</sup> Duke Global Health Institute, Duke University, Durham,  
19 North Carolina, <sup>4</sup> Center for the Study of Aging and Human Development and the Geriatric  
20  
21 Division of School of Medicine, Duke University, Durham, North Carolina  
22  
23  
24  
25  
26  
27  
28  
29

30 **Corresponding Author:**

31  
32 Chenkai Wu, PhD, MPH, MS

33  
34 Global Health Research Center

35  
36 Duke Kunshan University

37  
38 Academic Building 3038

39  
40 No. 8 Duke Avenue, Kunshan, Jiangsu, China, 215316

41  
42 Phone: (+86) 512 36657235

43  
44 Email: [chenkai.wu@dukekunshan.edu.cn](mailto:chenkai.wu@dukekunshan.edu.cn)  
45  
46  
47  
48  
49

50 Word count: 3526  
51  
52  
53  
54  
55  
56  
57  
58  
59  
60

1  
2  
3 **The Association between Allostatic Load and Mortality among Chinese Older Adults:**  
4  
5 **The Chinese Longitudinal Health and Longevity Study**  
6  
7

8 **Abstract**  
9

10 **Background:** Allostatic load has shown that high burden of AL is associated with increased  
11 risk of adverse outcomes, but little attention has been paid to China with largest aging  
12 population in the world.  
13  
14  
15

16  
17  
18  
19 **Objective:** This study is to examine the association between allostatic load (AL) and all-cause  
20 mortality among Chinese adults aged at least 60 years.  
21  
22  
23

24  
25  
26 **Design:** Population-based prospective cohort study.  
27  
28  
29

30  
31 **Setting:** In 2011-2012, an ancillary study, in which a blood test was added, including a total of  
32 2,439 participants, was conducted in eight longevity areas in the Chinese Longitudinal Healthy  
33 Longevity Survey.  
34  
35  
36

37  
38  
39  
40 **Participants:** The final analytic sample consisted of 1,519 participants (mean  $\pm$  SD age: men  
41 80.5 $\pm$ 11.3 years; women 90.2 $\pm$ 11.8 years; and 53% women).  
42  
43  
44

45  
46  
47 **Primary outcome measure:** Cox models were used to examine the association between AL  
48 and mortality among men and women, separately. Analysis were also adjusted for potential  
49 confounders including age, ethnicity, education, and marital status, smoking and exercise.  
50  
51  
52  
53  
54  
55  
56  
57  
58  
59  
60

1  
2  
3 **Results:** Male with a medium AL burden (score: 2-4) and high AL burden (score: 5-9) had a  
4  
5 33% and 118% higher hazard of death, respectively, than those with a low AL burden (score:  
6  
7 0-1). We did not find significant difference between females with different levels of AL burden.  
8  
9

10  
11  
12 **Conclusion:** Higher AL burden was associated with increased all-cause mortality among  
13  
14 Chinese men aged at least 60 years. However, we did not find strong association among women.  
15  
16 In conclusion, Intervention programs targeting modifiable components of the AL burden may  
17  
18 help prolong lifespan for older adults, especially men, in China.  
19  
20  
21  
22

23  
24 **Keywords:** Allostatic load; Mortality; China; Older adults.  
25  
26

## 27 ARTICLE SUMMARY

### 28 **Article focus**

- 29 • Is a higher burden of AL associated with increased risk of all-cause mortality among  
30  
31 both older men and women in China?  
32  
33  
34  
35

### 36 **Key messages**

- 37 • Higher AL burden was associated with increased all-cause mortality among Chinese  
38  
39 men aged at least 60 years.  
40  
41  
42
- 43 • We did not find strong evidence about Allostatic load was associated with specific  
44  
45 causes of death over the same follow-up period among women.  
46  
47

### 48 **Strengths and limitations of this study**

- 49 • This is the first to investigate the association between AL and mortality using a Chinese  
50  
51 population.  
52  
53
- 54 • The CLHLS dataset that is a large nationally representative old population survey in  
55  
56 China.  
57  
58
- 59 • The updated quartile risk method for biomarkers BMI, total cholesterol, and triglyceride  
60

1  
2  
3 among older adults.  
4

- 5 • We did not include any primary neuroendocrine biomarkers such as cortisol in  
6 constructing the AL score.  
7
- 8 • There is huge loss to follow up (>20%; 552 of 2439), although only 3 to 7-year range  
9 of follow up (2011 to 2014-18), which may underestimate the association.  
10  
11  
12  
13  
14  
15  
16  
17  
18  
19  
20  
21  
22  
23  
24  
25  
26  
27  
28  
29  
30  
31  
32  
33  
34  
35  
36  
37  
38  
39  
40  
41  
42  
43  
44  
45  
46  
47  
48  
49  
50  
51  
52  
53  
54  
55  
56  
57  
58  
59  
60

For peer review only

1  
2  
3 **The Association between Allostatic Load and Mortality among Chinese Older Adults:**  
4  
5 **The Chinese Longitudinal Health and Longevity Study**  
6  
7  
8  
9

10 BACKGROUND  
11

12 Allostatic load (AL) is conceptualized as the cumulative wear and tear on multiple  
13 physiological systems resulting from repeated adaptation to stressors [17,23,24]. In the absence  
14 of a gold standard, many operational definitions of AL have been proposed. The most  
15 commonly used construct of AL was developed by Seeman and colleagues who have used two  
16 categories of biomarkers for quantifying AL [15,24]. The first category (called primary  
17 mediators) includes biomarkers the body releases in response to stress, such as cortisol and  
18 dehydroepiandrosterone sulphate (DHEA-S); the second category comprises comprises  
19 secondary outcomes that result from the effects of primary mediators. The examples of  
20 biomarkers are blood pressure (BP), cholesterol, and waist-hip ratio [24].  
21  
22  
23  
24  
25  
26  
27  
28  
29  
30  
31  
32  
33  
34

35 A number of studies identified that a high burden of AL is associated with increased risk of  
36 adverse outcomes including cardiovascular disease, functional decline, and mortality among  
37 older adults [1,13,14,17,18,20,25]. For example, in a 7-year longitudinal study conducted in  
38 2006, increased AL score was associated with higher mortality among older population [18].  
39 In a cohort study of 1,023 community-dwelling older adults in Taiwan, researchers found that  
40 higher AL score was related with higher death rate [14]. Additionally, some studies found that  
41 women and men experienced chronic stress in different ways. For example, Yang et al in 2011  
42 revealed gender difference in the AL biomarkers and the age trajectories of physiological  
43 dysregulation [33]. Women had higher level of inflammation biomarkers but lower risk of  
44 cardiovascular disease (CVD) than men. Another study from Tampubolon and Maharani in  
45 2018 among older population found that AL score increased in sex difference [34]. Compared  
46  
47  
48  
49  
50  
51  
52  
53  
54  
55  
56  
57  
58  
59  
60



1  
2  
3 with men, women showed advantage in life expectancy [34]. Taken together, these results  
4 suggest the use of sex-specific cut-off points for AL biomarkers in future research.  
5  
6  
7  
8  
9

10 A number of studies have examined the association between AL and mortality among older  
11 adults. However, little attention has been paid to less developed regions, including China – the  
12 most populous country with the largest aging population in the world. In 2019, there were 249  
13 million adults aged 60 years or above in China, accounting for 17.3% of its total population,  
14 and this number is projected to almost double in 2050, reaching 487 million [4,5].  
15 Understanding the relationship between AL and mortality in less developed country is  
16 beneficial for leading to interventions, which could be helpful to change unhealthy lifestyle,  
17 decrease morbidity and mortality among older population. In addition, less studies focus on  
18 sex-specific cut off points for calculating AL index, this study will conduct sex-specific studies,  
19 which may closely reflect AL score among older population.  
20  
21  
22  
23  
24  
25  
26  
27  
28  
29  
30  
31  
32  
33  
34

35 In this study, we used a large cohort study to examine the association between AL and all-  
36 causes mortality among Chinese men and women aged at least 60 years. We hypothesized that  
37 a higher burden of AL would be associated with increased risk of all-cause mortality among  
38 both older men and women in China.  
39  
40  
41  
42  
43  
44  
45  
46

## 47 METHODS

### 48 **Data and Study Participants**

49 We used data from the Chinese Longitudinal Healthy Longevity Survey (CLHLS), an ongoing  
50 prospective, longitudinal study with the largest sample of the oldest old in China. Half of the  
51 counties and cities in 22 of the 31 provinces in China (covering 85% of the population) were  
52 randomly selected through a multistage cluster sampling approach. A wide range of socio-  
53  
54  
55  
56  
57  
58  
59  
60

1  
2  
3 demographic, lifestyle, and health measures were collected in the CLHLS. The baseline survey  
4 was conducted in 1998 and participants who were alive were re-interviewed in each follow-up  
5 survey (2000, 2002, 2005, 2008-2009, 2011-2012, 2014, and 2017-2018). In 2011-2012, an  
6 ancillary study, in which a blood test was added, was conducted in eight longevity areas:  
7  
8 Laizhou City in Shandong Province, Xiayi County in Henan Province, Zhongxiang City in  
9  
10 Hubei Province, Mayang County in Hunan Province, Yongfu County in Guangxi Autonomous  
11  
12 Area, Sanshui District in Guangdong Province, Chengmai County in Hainan Province, and  
13  
14 Rudong County in Jiangsu Province. The Research Ethics Committees of Peking University  
15  
16 and Duke University granted approval for the Protection of Human Subjects for the CLHLS.  
17  
18 All study participants gave informed consent. A more detailed description of the recruitment  
19  
20 strategy and study design of the CLHLS has been published elsewhere [11,31,32]. A total of  
21  
22 8,959 individuals were included at baseline (1998). 1998 baseline survey, which was extended  
23  
24 to 11,162 in 2000, it was found that almost 30 percent died before 2002 interview and  
25  
26 approximately 14 percent were lost that was higher than the attrition rate between 1998 and  
27  
28 2000 wave (9.6 percent); the number of participants were extend to 16,064 in 2002, and about  
29  
30 13.8 percent were lost between 2002 and 2005; the number of interviewed were 15,638 in 2005,  
31  
32 and about 13.2 percent were lost between 2005 and 2008-2009; the number of participants were  
33  
34 extended to 16,540, and approximately 17.7 percent were lost between 2008-2009 and 2011-  
35  
36 2012; the total number of interviewed participants were 9765 in 2011-2012 [35].  
37  
38  
39  
40  
41  
42  
43  
44  
45  
46  
47  
48

49 A total of 2,439 persons contributed blood sample in the ancillary study (2011-2012).  
50  
51 Participants were excluded from the analytic sample if they had (i) incomplete data on any  
52  
53 biomarkers for constructing AL (n = 251), (ii) no follow-up data (time to death or censorship  
54  
55 was undetermined; n = 552), (iii) had extreme values on the biomarkers (n = 109), or (iv) were  
56  
57 less than 60 years old (n=16). The final analytic sample consisted of 1,519 participants. We did  
58  
59  
60

1  
2  
3 not observe appreciable differences in age, ethnicity, marital status, smoking, or chronic  
4 conditions between the analytic sample and those excluded (n = 920; Table S1). Compared to  
5 the analytic sample, excluded persons had higher education level and higher prevalence of  
6 exercise. In addition, compared to people who were loss follow up, the included people had  
7 higher prevalence of married, and higher prevalence of stroke; we did not observe appreciable  
8 differences in age, ethnicity, smoking, exercise, hypertension, diabetes, heart disease,  
9 pulmonary, arthritis, and cancer between both (Table S4).

### 21 **Calculation of AL Score**

22  
23 Based on previous research [2,9,14,23] and availability of data in the CLHLS, we selected nine  
24 biomarkers to construct AL: heart rate, systolic BP (SBP), and diastolic BP (DBP), body mass  
25 index (BMI), total cholesterol, high density lipoprotein (HDL) cholesterol, glucose,  
26 triglyceride, and C-reactive protein (CRP). BMI, heart rate, SBP, and DBP were collected from  
27 physical examinations. BMI was calculated as body weight (kilograms) divided by height  
28 (meters) squared. SBP and DBP were measured by a mercury sphygmomanometer with an  
29 appropriately sized cuff, taken in the seated position after 5 minutes of quiet rest under the  
30 supervision of trained research assistants. We used the average of two measurements for further  
31 analyses. Blood samples were used for assays of the level of the total cholesterol, HDL  
32 cholesterol, glucose, triglyceride, and CRP.

33  
34  
35  
36  
37  
38  
39  
40  
41  
42  
43  
44  
45  
46  
47  
48  
49 To be in line with previous studies [6,8,24,25], we used the highest quartile for heart rate, SBP,  
50 DBP, glucose, and CRP and the lowest quartile for HDL cholesterol to define high-risk group  
51 (coded 1). Because BMI, total cholesterol, and triglyceride were inversely associated with  
52 mortality among older adults, especially the oldest old [19,29,30], we used the lowest quartile  
53 to define high-risk group for these three biomarkers. For participants who self-reported having  
54  
55  
56  
57  
58  
59  
60

1  
2  
3 been diagnosed with hypertension and heart disease, we classified their SBP, DBP, and glucose  
4 into the high-risk category. Similarly, we classified participants' glucose into the high-risk  
5 group if they self-reported having been diagnosed with diabetes. The identification of risk  
6 quartiles of biomarkers is commonly used to construct AL index [15, 36]. The cut-points of all  
7 nine AL components by men and women were presented in Table 1. We constructed the AL  
8 score based on the count of biomarkers falling in the high-risk group, ranging from 0 (lowest)  
9 to 9 (highest). To be in line with previous studies [37], we then considered using similar cut-  
10 off points, classifying the AL score into three categories based on sample distribution: 0-1 (low  
11 burden), 2-4 (medium burden), and 5-9 (high burden).  
12  
13  
14  
15  
16  
17  
18  
19  
20  
21  
22  
23  
24  
25

## 26 **Mortality**

27  
28 The outcome was all-cause mortality. Vital status and date of death (for persons who died by  
29 the end of the study) was ascertained by the close family member or village doctor of the  
30 deceased participant during the follow-up survey in 2014 and 2017-2018. We calculated the  
31 survival time from the date of the baseline interview to the date of last interview (censored) or  
32 the death date.  
33  
34  
35  
36  
37  
38  
39  
40  
41

## 42 **Covariates**

43  
44 Demographic and lifestyle characteristics were collected by interview, including age, sex,  
45 ethnicity, education, and marital status, smoking status, and physical exercise. We divided  
46 ethnicity into Han and others (minority groups). Years of education were dichotomized as any  
47 (one year or more) and no education, which is commonly way used in CLHLS study [38, 39].  
48 Marital status was dichotomized as married and others (widowed, not married, and divorced).  
49 Cigarette smoking was categorized as current, past, and non-smoker. Information of exercise  
50 was collected using the question "Do you do exercise at present?" and dichotomized into yes  
51  
52  
53  
54  
55  
56  
57  
58  
59  
60

1  
2  
3 or no. Chronic conditions were measured based on self-reported physician's diagnosis,  
4 including hypertension, diabetes, heart disease, stroke, pulmonary disease (including bronchitis,  
5 emphysema, pneumonia and asthma), arthritis, and cancer.  
6  
7  
8  
9

## 10 11 12 **Statistical Analyses**

13  
14 All analyses were conducted separately for males and females. We first presented the relative  
15 frequency of the AL score using histograms and calculated mean AL score. Then, we described  
16 the baseline characteristics of study sample by AL burden (low, medium, and high) using  
17 means and SDs for continuous variables and counts and percentages for categorical variables.  
18  
19 Characteristics were compared across the three AL categories using analyses of variance for  
20 continuous variables and chi-square tests for categorical variables.  
21  
22  
23  
24  
25  
26  
27  
28  
29  
30

31 We calculated the death rates across three AL categories (low, medium, and high burden). We  
32 used the Cox proportional hazards model to determine the unadjusted and adjusted associations  
33 between the AL and all-cause mortality. Age, sex, education, and marital status were included  
34 in the demographically adjusted models; smoking status, physical exercise, and chronic status  
35 including pulmonary disease and arthritis were added in the fully adjusted models. We  
36 modelled AL both continuously and in categories.  
37  
38  
39  
40  
41  
42  
43  
44  
45  
46

47 Furthermore, one sensitivity analysis was undertaken, which aimed to exam if the model results  
48 were influenced when we did not use self-reported hypertension or diabetes to classify  
49 participants' risk category for BP or glucose.  
50  
51  
52  
53  
54  
55

56 All tests were two-sided with a significance level of P-value less than 0.05. We conducted all  
57 analyses using STATA version 16.0 (Stata Corp, College Station, TX).  
58  
59  
60

## Patient and public involvement

This research was done without patient involvement. Patients were not invited to comment on the study design and were not consulted to develop patient-relevant outcomes or interpret the results. Patients were not invited to contribute to the writing or editing of this document for readability or accuracy.

## RESULTS

### Distribution of Allostatic Load Categories

The distribution of the AL score (range: 0-9) is right-skewed for both males and females; only 13 (1.8%) males and 10 (1.2%) females had a score of 6-9, respectively (Figure 1). The mean AL score was 2.56 (SD=1.47) for males and 2.28 (SD=1.34) for females. For males, 25.5%, 65.3%, and 10.3% had an AL score of 0-1, 2-4, and 5-9, respectively. For females, 28.5%, 65.9%, and 5.6% had an AL score of 0-1 (low burden), 2-4 (medium burden), and 5-9 (high burden), respectively.

### Demographic Characteristics

A total of 709 (46.7%) males were included. The average age for males with an AL score of 0-1 (low burden), 2-4 (medium burden), 5-9 (high burden) was 77.6, 81.0, and 84.1 years, respectively ( $P = 0.042$ ). In addition, we observed significant differences in the prevalence hypertension and diabetes by different AL burden among males.

The study sample included 810 (53.3%) females. The average age for females with an AL score of 0-1 (low burden), 2-4 (medium burden), 5-9 (high burden) was 87.0, 91.3, and 93.6 years, respectively ( $P < 0.05$ ; Table 2). Compared with men, women were older, less educated, had a lower prevalence of smoking, and were less physically active. Females with a lower AL were

1  
2  
3 more likely to be married and have any education than woman with higher AL score; they also  
4  
5 had a lower prevalence of hypertension, diabetes, and heart disease. We did not observe  
6  
7 significant difference in ethnicity, smoking, physical exercise, stroke, pulmonary disease,  
8  
9 arthritis, and cancer across AL burden (low, medium, and high) among females.  
10  
11  
12  
13

### 14 **Association between Allostatic Load and Mortality among Males**

15  
16  
17 A total of 310 males died; the overall death rate was 105.7 per 1,000 person-years. Males with  
18  
19 an AL score of 0-1 (low), 2-4 (medium), and 5-9 (high) had a death rate of 66.1, 110.4.6, and  
20  
21 201.3 per 1,000 person-years, respectively (Table 3).  
22  
23  
24  
25

26  
27 In the unadjusted Cox model, per unit higher AL score was significantly associated with a 75%  
28  
29 higher hazard of death among males (95% CI: 44%, 112%; Table 3). The association slightly  
30  
31 attenuated but persisted in the full adjusted model (hazard ratio [HR] = 1.51, 95% CI: 1.23,  
32  
33 1.84). When modelled in categories, in the unadjusted model, the hazard of death of male with  
34  
35 the medium AL burden (score: 2-4) was 1.68 times than hazard of death of those with a lower  
36  
37 AL burden (score: 0-1); Male with a high AL burden (Score: 5-9) had a more than three-fold  
38  
39 hazard of death than those with a lower AL burden (score: 0-1). These associations persisted  
40  
41 after adjustment of socio-demographics and lifestyles. In the fully adjusted model, males with  
42  
43 a medium AL burden (score: 2-4) had a 33% higher hazard of death than those with a low AL  
44  
45 burden (score: 0-1). Males with a high AL burden (score: 5-9) had a more than two-fold hazard  
46  
47 of death than those with a low AL burden (score: 0-1). Results did not change substantially in  
48  
49 the sensitivity analyses (Tables S3).  
50  
51  
52  
53  
54  
55

### 56 **Association between Allostatic Load and Mortality among Females**

1  
2  
3 Over an average follow-up period of 3.9 years, 787 deaths (51.8%) occurred. A total of 477  
4 females died (58.9%); the overall death rate was 161.3 per 1,000 person-years. The death rates  
5 for females with an AL score of 0-1 (low burden), 2-4 (medium burden), and 5-9 (high burden)  
6 were 121.1, 174.8, and 252.6 per 1,000 person-years, respectively (Table 3).  
7  
8  
9  
10  
11  
12

13  
14 In the unadjusted Cox model, per unit higher AL (modelled continuously) was significantly  
15 associated with a 45% higher hazard of death among females (95% CI: 23%, 72%; Table 3).  
16 However, the association attenuated and became insignificant after adjusting for socio-  
17 demographics (age, sex, ethnicity, education, and marital status); similar results were observed  
18 when smoking, exercise, and chronic conditions including pulmonary disease and arthritis were  
19 additionally adjusted (HR = 1.16, 95% CI: 0.97, 1.38). When modelled in categories, the HR  
20 was 1.44 (95% CI: 1.17, 1.79) and 2.11 (95% CI: 1.44, 3.10) for females with an AL score of  
21 2-4 and 5-9, respectively, compared with those with a score of 0-1 in the unadjusted model.  
22 After multivariable adjustment, females with an AL score of 2-4 and 5-9 had a 11% and 34%  
23 higher hazard of death, although the associations were not significant. Results did not change  
24 substantially in the sensitivity analyses (Tables S3).  
25  
26  
27  
28  
29  
30  
31  
32  
33  
34  
35  
36  
37  
38  
39  
40  
41  
42

## 43 DISCUSSION

44 The present study aimed to explore the association between AL burden and all-cause mortality  
45 among men and women aged at least 60 years in China. We found that older men with high  
46 AL burden had a more than two-fold hazard of death than those with a low AL burden.  
47 However, the association was less clear among women. These findings were in line with  
48 previous studies showing men tend to have higher AL with higher risk of death than women,  
49 and gender difference among AL score and cause-specific mortality risk including infectious  
50 diseases, cardiometabolic disease, and malignant neoplasm [14,26,27]. One possible  
51  
52  
53  
54  
55  
56  
57  
58  
59  
60



1  
2  
3 explanation for the sex difference in the association between AL and mortality among older  
4 adults is that older women might be less vulnerable to stress men due to sex difference in  
5 hippocampal formation in humans [10,16,21]. In addition, it has been shown that estrogen plays  
6 an important role in brain with the development of aging, aiming to maintain allostasis when  
7 facing physiological stress, which may be possible to protect women against age-related  
8 diseases [3,22,28]. Moreover, Gruenewald et al. (2006) stated that gender difference in  
9 forecasting mortality risk among older people by biomarkers; compared with female,  
10 neuroendocrine and immune related biomarkers were more predictive in male [12]. In addition,  
11 the sex difference in the association between AL and mortality may be explained by behavioral  
12 factors. Social support is an effective in relieving stress [40]. Women are more socially active  
13 to seek emotional support when facing stress than men [40]. Furthermore, in our study, women  
14 had high mean age, less education, lower prevalence of smoking, and less exercise. Therefore,  
15 adjustment of these covariates may influence the significant level of association in final model.  
16  
17  
18  
19  
20  
21  
22  
23  
24  
25  
26  
27  
28  
29  
30  
31  
32  
33  
34

35 Previous study has identified increased risk of all-cause mortality associated with increasing  
36 AL score in men [14]. We found that the strength of the association differed between the  
37 present study and Hwang et al.'s work. There are several plausible explanations for this  
38 discrepancy. First, the population in Hwang et al.'s study ( $\geq 54$  years) was younger than ours  
39 ( $\geq 60$  years). Second, we did not include cortisol, which is a commonly used indicator of the  
40 primary mediator stress, due to data unavailability. Surrogate measures were used in the present  
41 study, which may lead to weaker associations. Third, two studies used different cut-points for  
42 constructing the AL score. We used sex-specific cut-off points for each biomarker; while  
43 general cut-points were used in Hwang et al.'s work. Fourth, follow-up length was different  
44 between the two studies.  
45  
46  
47  
48  
49  
50  
51  
52  
53  
54  
55  
56  
57  
58  
59  
60

1  
2  
3 For the sensitivity analysis of association between AL and mortality, the overall magnitude of  
4 the HR was not largely altered, and the association were still statically significant. This suggest  
5 that the results of association between AL category and mortality may not influenced by the  
6 participants who were self-reported disease status, which may support that our results are  
7 robust (Table S3).  
8  
9

10  
11  
12 The AL was initially constructed using primary mediator stress including cortisol, epinephrine,  
13 and norepinephrine. These biomarkers are not widely available and secondary responses of  
14 cardiovascular, inflammatory and metabolic biomarkers such as CRP, BP and heart rate were  
15 used as surrogate measures. Although multiple CVD risk factors were included, AL, in theory,  
16 represents multisystem physiological dysregulation instead of functional decline in one system.  
17 Previous studies showed that AL was able to stratify the risk of a wider range health outcomes  
18 than traditional CVD risk factors [24], it appears that AL could predict more health information  
19 including CVD incident, decline of cognition function, decline of physical function, and  
20 mortality than traditional CVD risk factors. The current study did not have data on primary  
21 mediator of AL, so we did not conduct separate analysis to investigate the association between  
22 primary vs. secondary mediators of AL and mortality.  
23  
24  
25  
26  
27  
28  
29  
30  
31  
32  
33  
34  
35  
36  
37  
38  
39  
40  
41

42 This study has some strengths. This is among the first to investigate the association between  
43 AL and mortality using a Chinese population. Moreover, our study used of CLHLS dataset that  
44 is a large nationally representative old population survey in China. Furthermore, we updated  
45 quartile risk method for biomarkers BMI, total cholesterol, and triglyceride due to inversely  
46 association with mortality among older adults, which may more truly reflect AL score in old  
47 people. Additionally, our study added evidence to support sex difference in the association  
48 between AL and the increased risk of mortality. Finally, sex-specific cut-off points were used  
49 to construct the AL score may more truly reflect association between AL and mortality in  
50  
51  
52  
53  
54  
55  
56  
57  
58  
59  
60

1  
2  
3 different gender compared previous study. Additionally, we collected detailed covariates  
4 information including age, sex, marital status, ethnicity, education, chronic diseases, which  
5 enable us to adjust for a range of potential confounders in the final cox model.  
6  
7  
8  
9

10  
11  
12 Despite these strengths, we acknowledge some limitations. First, we did not include any  
13 primary neuroendocrine biomarkers such as cortisol in constructing the AL score due to data  
14 limitation. The cortisol biomarker plays an important role in responding stress, which needs  
15 repeated measurements within 1-2 days which causes difficulties to measure in large national  
16 survey [7]. Inclusion of cortisol biomarker maybe improve our power of AL score predictions  
17 for mortality. Additionally, we classified AL biomarkers based on sex-specific quartiles;  
18 however, these measures may vary over time, leading to misclassification. Furthermore, there  
19 is huge loss to follow up (>20%; 552 of 2439), although only 3 to 7-year range of follow up  
20 (2011 to 2014-18), which may underestimate the association. Lastly, participants who provided  
21 blood sample in this study were residents in eight longevity areas including Laizhou of  
22 Shandong Province, Xiayi of Henan Province, Zhongxiang of Hubei Province, Mayang of  
23 Hunan Province, Sanshui of Guangdong Province, Yongfu of Guangxi Autonomous Region,  
24 Chengmai of Hainan Province, Rudong of Jiangsu Province, which were from 8 of 23  
25 provinces, five autonomous regions, four municipalities, and two special administrative  
26 regions. Therefore, our results may not be greatly generalizable to older adults living in other  
27 regions of China.  
28  
29  
30  
31  
32  
33  
34  
35  
36  
37  
38  
39  
40  
41  
42  
43  
44  
45  
46  
47  
48  
49  
50

51 Therefore, even though we found that higher AL burden was associated with increased all-  
52 cause mortality among Chinese men aged at least 60 years, but not women, it is really  
53 recommended that these results need to be replicated in large longitudinal studies with more  
54 longer follow-up time, with more AL biomarkers such as cortisol, or with containing Chinese  
55  
56  
57  
58  
59  
60

1  
2  
3 from more regions apart from eight longevity areas. This would helpful for comparing with our  
4 results and validating them in different population.  
5  
6  
7  
8  
9

## 10 CONCLUSION

11  
12 In conclusion, our study showed that higher AL burden was associated with increased all-cause  
13 mortality among Chinese men aged at least 60 years. We did not find strong evidence among  
14 women. Intervention programs targeting modifiable components of the AL burden may help  
15 prolong lifespan for older adults, especially men, in China.  
16  
17  
18  
19  
20  
21  
22  
23  
24  
25  
26  
27  
28  
29  
30  
31  
32  
33  
34  
35  
36  
37  
38  
39  
40  
41  
42  
43  
44  
45  
46  
47  
48  
49  
50  
51  
52  
53  
54  
55  
56  
57  
58  
59  
60

**Abbreviation:**

AL: allostatic load; DHEA-S: dehydroepiandrosterone sulphate; BP: blood pressure; CLHLS: Chinese Longitudinal Healthy Longevity Survey; SBP: systolic BP; DBP: diastolic BP; BMI: body mass index; HDL: total cholesterol, high density lipoprotein; CRP: C-reactive protein.

**DECLARATIONS:****Ethics approval and consent to participate:**

The original CLHLS protocol was approved by the Institutional Review Board, Duke University (Pro00062871), and the Biomedical Ethics Committee, Peking University (IRB00001052-13074), and all participants have signed informed consent.

**Consent to publish:**

Not required

**Availability of data and materials:**

The raw data are available on website:

<https://opendata.pku.edu.cn/dataset.xhtml?persistentId=doi:10.18170/DVN/WBO7LK>

**Competing interests:**

Dr. Chenkai Wu provides paid consultant services to Health Keepers, a start-up health data analytics company in China. Other authors have no conflict of interests to disclose.

**Funding:**

The data analyzed in this paper were provided by the Chinese Longitudinal Healthy Longevity Study (CLHLS) which has been jointly supported by National Natural Sciences Foundation of

1  
2  
3 China (71490732) and the National Key R&D Program of China (2018YFC2000400); Ministry  
4 of Science and Technology in China (2020YFC2005600); Suzhou Municipal Science and  
5 Technology Bureau (SS2019069). The research results of this article are sponsored partly by  
6  
7  
8  
9  
10 the Kunshan Municipal Government research funding.

11  
12  
13  
14  
15 The funder played no role in study design, data collection, and analysis, the decision to publish,  
16  
17 or preparation of the manuscript.

#### 21 **Author Contributions:**

22  
23  
24 THZ conceived of and conducted the data analyses, interpreted the findings, and wrote the  
25  
26 manuscript. LJY, HSC and HYJ contributed to manuscript revision. CKW contributed to  
27  
28 analysis and interpretation of data and drafting and revision of the manuscript.

#### 33 **Acknowledgements:**

34  
35 Not Applicable

#### 40 **REFERENCE LIST:**

- 41  
42  
43 1. Beckie, Theresa M. "A systematic review of allostatic load, health, and health disparities."  
44  
45 Biological research for nursing. 2012; 14(4): 311-346.
- 46  
47 2. Borrell, L. N., Dallo, F. J., & Nguyen, N. Racial/ethnic disparities in all-cause mortality in  
48  
49 US adults: the effect of allostatic load. Public health reports, 2010; 125(6):810-816.
- 50  
51 3. Borrás, C., Gambini, J., Gómez-Cabrera, M. C., Sastre, J., Pallardó, F. V., Mann, G. E., &  
52  
53 Viña, J. 17 $\beta$ -oestradiol up-regulates longevity-related, antioxidant enzyme expression via  
54  
55 the ERK1 and ERK2 [MAPK]/NF $\kappa$ B cascade. Aging cell; 2005; 4(3):113-118.
- 56  
57  
58 4. China Population (Age 60+): The 2019 Revision. 2019. Retrieved from  
59  
60

- 1  
2  
3 <https://population.un.org/wpp/Graphs/Probabilistic/POP/60plus/156> Accessed 22 Nov  
4  
5 [2019](#).  
6  
7
- 8 5. China population. Worldometers. 2019. Retrieved from  
9  
10 <https://www.worldometers.info/world-population/china-population/> Accessed 22 Nov  
11  
12 2019.  
13
- 14 6. Crimmins, E. M., Johnston, M., Hayward, M., & Seeman, T. Age differences in allostatic  
15 load: an index of physiological dysregulation. *Experimental gerontology*. 2003; 38(7): 731-  
16 734.  
17
- 18 7. Dowd, J. B., Simanek, A. M., & Aiello, A. E. Socio-economic status, cortisol and allostatic  
19 load: a review of the literature. *International journal of epidemiology*. 2009;38(5): 1297-  
20 1309.  
21
- 22 8. Duong, M. T., Bingham, B. A., Aldana, P. C., Chung, S. T., & Sumner, A. E. Variation in  
23 the calculation of allostatic load score: 21 examples from NHANES. *Journal of racial and*  
24 *ethnic health disparities*. 2017; 4(3): 455-461.  
25
- 26 9. Geronimus, A. T., Hicken, M., Keene, D., & Bound, J. “Weathering” and age patterns of  
27 allostatic load scores among blacks and whites in the United States. *American journal of*  
28 *public health*. 2006; 96(5): 826-833.  
29
- 30 10. Gould, E., Westlind-Danielsson, A., Frankfurt, M., & McEwen, B. S. Sex differences and  
31 thyroid hormone sensitivity of hippocampal pyramidal cells. *Journal of Neuroscience*.  
32 1990; 10(3): 996-1003.  
33
- 34 11. Gu, D., & Dupre, M. E. Assessment of reliability of mortality and morbidity in the 1998–  
35 2002 CLHLS waves. In *Healthy Longevity in China*. Springer, Dordrecht. 2008; 99-116.  
36
- 37 12. Gruenewald, T. L., Seeman, T. E., Ryff, C. D., Karlamangla, A. S., & Singer, B. H.  
38 Combinations of biomarkers predictive of later life mortality. *Proceedings of the National*  
39 *Academy of Sciences*. 2006; 103(38): 14158-14163.  
40  
41  
42  
43  
44  
45  
46  
47  
48  
49  
50  
51  
52  
53  
54  
55  
56  
57  
58  
59  
60

- 1  
2  
3 13. Gruenewald, T. L., Seeman, T. E., Karlamangla, A. S., & Sarkisian, C. A. Allostatic load  
4 and frailty in older adults. *Journal of the American Geriatrics Society*. 2009; 57(9): 1525-  
5 1531.  
6  
7
- 8  
9  
10 14. Hwang, A. C. et al. Predicting all-cause and cause-specific mortality by static and dynamic  
11 measurements of allostatic load: a 10-year population-based cohort study in Taiwan.  
12 *Journal of the American Medical Directors Association*. 2014; 15(7): 490-496.  
13  
14
- 15 15. Juster, R. P., McEwen, B. S., & Lupien, S. J. Allostatic load biomarkers of chronic stress  
16 and impact on health and cognition. *Neuroscience & Biobehavioral Reviews*. 2010; 35(1):  
17 2-16.  
18  
19
- 20 16. Kimura, D. Sex differences in the brain. *Scientific American*. 1992; 267(3): 118-125.  
21  
22
- 23 17. Karlamangla, A. S., Singer, B. H., & Seeman, T. E. Reduction in allostatic load in older  
24 adults is associated with lower all-cause mortality risk: MacArthur studies of successful  
25 aging. *Psychosomatic medicine*. 2006; 68(3): 500-507.  
26  
27
- 28 18. Karlamangla, A. S. et al. Allostatic load as a predictor of functional decline: MacArthur  
29 studies of successful aging. *Journal of clinical epidemiology*. 2002; 55(7): 696-710.  
30  
31
- 32 19. Lv, Y. B. et al. Triglycerides paradox among the oldest old: "the lower the better?". *Journal*  
33 *of the American Geriatrics Society*. 2019; 67(4): 741-748.  
34  
35
- 36 20. Levine, M. E., & Crimmins, E. M. A comparison of methods for assessing mortality risk.  
37 *American Journal of Human Biology*. 2014; 26(6): 768-776.  
38  
39
- 40 21. McEwen, B. S. Protective and damaging effects of stress mediators. *New England journal*  
41 *of medicine*. 1998; 338(3): 171-179.  
42  
43
- 44 22. Paulson, P. E., Minoshima, S., Morrow, T. J., & Casey, K. L. Gender differences in pain  
45 perception and patterns of cerebral activation during noxious heat stimulation in humans.  
46 *Pain*. 1998; 76(1-2): 223-229.  
47  
48
- 49 23. Robertson, T., Beveridge, G., & Bromley, C. Allostatic load as a predictor of all-cause and  
50  
51  
52  
53  
54  
55  
56  
57  
58  
59  
60



- 1  
2  
3 cause-specific mortality in the general population: evidence from the Scottish Health  
4 Survey. *PloS one*. 2017; 12(8).  
5  
6  
7  
8 24. Seeman, T. E., McEwen, B. S., Rowe, J. W., & Singer, B. H. Allostatic load as a marker of  
9 cumulative biological risk: MacArthur studies of successful aging. *Proceedings of the*  
10 *National Academy of Sciences*. 2001; 98(8): 4770-4775.  
11  
12  
13  
14 25. Seeman, T. et al. Modeling multisystem biological risk in young adults: the Coronary  
15 Artery Risk Development in Young Adults Study. *American Journal of Human Biology:*  
16 *The Official Journal of the Human Biology Association*. 2010; 22(4): 463-472.  
17  
18  
19  
20 26. Seeman, T. E. et al. Social relationships, gender, and allostatic load across two age cohorts.  
21 *Psychosomatic medicine*. 2002; 64(3): 395-406.  
22  
23  
24  
25 27. Thomson, E. M., Kalayci, H., & Walker, M. Cumulative toll of exposure to stressors in  
26 Canadians: An allostatic load profile. *Health Reports*. 2019; 30(6): 14-21.  
27  
28  
29  
30 28. Vina, J. et al. Why females live longer than males: control of longevity by sex hormones.  
31 *Science of aging knowledge environment: SAGE KE*. 2005;(23): pe17-pe17.  
32  
33  
34  
35 29. Winter, J. E., MacInnis, R. J., Wattanapenpaiboon, N., & Nowson, C. A. BMI and all-cause  
36 mortality in older adults: a meta-analysis. *The American journal of clinical nutrition*. 2014;  
37 99(4): 875-890.  
38  
39  
40  
41 30. Weverling-Rijnsburger, A. W. et al. Total cholesterol and risk of mortality in the oldest  
42 old. *The Lancet*. 1997; 350(9085): 1119-1123.  
43  
44  
45  
46 31. Yi, Z. Introduction to the chinese longitudinal healthy longevity survey (CLHLS). In  
47 *Healthy longevity in China*. Springer, Dordrecht.2008a; 23-38  
48  
49  
50 32. Yi, Z. Reliability of age reporting among the Chinese oldest-old in the CLHLS datasets. In  
51 *Healthy Longevity in China*. Springer, Dordrecht. 2008b; 61-78.  
52  
53  
54  
55 33. Yang Y. Kozloski M. Sex differences in age trajectories of physiological dysregulation:  
56 inflammation, metabolic syndrome, and allostatic load. *Journals of Gerontology Series A:*  
57  
58  
59  
60

- 1  
2  
3 Biomedical Sciences and Medical Sciences, 2011; 66(5), 493-500.  
4  
5  
6 34. Tampubolon G, Maharani A. Trajectories of allostatic load among older Americans and  
7  
8 Britons: longitudinal cohort studies[J]. BMC geriatrics, 2018, 18(1): 255.  
9  
10 35. Zeng, Y., Poston, D. L., Vlosky, D. A., & Gu, D. (Eds.). (2008). Healthy longevity in China:  
11  
12 demographic, socioeconomic, and psychological dimensions (Vol. 20). Springer Science  
13  
14 & Business Media.  
15  
16 36. Sanna Read and Emily Grundy. Allostatic load and health in the older population of  
17  
18 England: a crossed-lagged analysis. Psychosomatic medicine, 76(7):490, 2014.  
19  
20 37. Castagné R, Garès V, Karimi M, et al. Allostatic load and subsequent all-cause mortality:  
21  
22 which biological markers drive the relationship? Findings from a UK birth cohort[J].  
23  
24 European journal of epidemiology, 2018, 33(5): 441-458.  
25  
26 38. Zhu A, Yan L L, Wu C D, et al. Residential greenness, activities of daily living, and  
27  
28 instrumental activities of daily living: A longitudinal cohort study of older adults in  
29  
30 China[J]. Environmental Epidemiology, 2019, 3(5): e065.  
31  
32 39. Ji J S, Zhu A, Bai C, et al. Residential greenness and mortality in oldest-old women and  
33  
34 men in China: a longitudinal cohort study[J]. The Lancet  
35  
36 40. Hamaideh, S. H. Gender differences in stressors and reactions to stressors among Jordanian  
37  
38 university students. International Journal of Social Psychiatry, 2012; 58(1), 26–33.  
39  
40  
41  
42  
43  
44  
45  
46  
47  
48  
49  
50  
51  
52  
53  
54  
55  
56  
57  
58  
59  
60

**Table 1.**

Cut-point for each of nine biomarkers used to construct allostatic load.

| <b>Biomarkers</b>                            | <b>Cut-points</b> |               |
|----------------------------------------------|-------------------|---------------|
|                                              | <b>Male</b>       | <b>Female</b> |
| Body mass index, kg/m <sup>2</sup>           | ≤19.33            | ≤17.78        |
| Glucose, mmol/L                              | ≥5.13             | ≥5.15         |
| Total cholesterol, mmol/L                    | ≤3.51             | ≤3.71         |
| High-density lipoprotein cholesterol, mmol/L | ≤1.04             | ≤1.06         |
| Triglyceride, mmol/L                         | ≤0.56             | ≤0.63         |
| High-sensitive C reactive protein, mg/L      | ≥2.44             | ≥2.33         |
| Heart rate, beats/min                        | ≥80               | ≥83           |
| Systolic blood pressure, mmHg                | ≥150              | ≥160          |
| Diastolic blood pressure, mmHg               | ≥90               | ≥90           |

High-risk group was defined as below the sex-specific 25th percentile for body mass index, total cholesterol, high-density lipoprotein cholesterol and triglyceride. High-risk group was defined as above the sex-specific 75th percentile for glucose, high-sensitive C reactive protein, heart rate, systolic blood pressure, and diastolic blood pressure.

**Table 2.**

Baseline characteristics by allostatic load burden (low, medium, and high) among males and females.

|                        | Male (N=709) |                |                   |                |         | Female (N=810) |                |                   |                |         |
|------------------------|--------------|----------------|-------------------|----------------|---------|----------------|----------------|-------------------|----------------|---------|
|                        | Total        | Low<br>(n=181) | Medium<br>(n=455) | High<br>(n=73) | P-value | Total          | Low<br>(n=231) | Medium<br>(n=534) | High<br>(n=45) | P-value |
| Age, years, mean±SD    | 80.5±11.3    | 77.6±10.7      | 81.0±11.4         | 84.1±11.0      | 0.042   | 90.2±11.8      | 87.0±13.0      | 91.3±11.1         | 93.6±11.0      | 0.029   |
| Married, No. (%)       | 446 (62.9%)  | 125 (69.1%)    | 276 (60.7%)       | 45 (61.6%)     | 0.137   | 173 (21.4%)    | 65 (28.1%)     | 101 (18.9%)       | 7 (15.6%)      | 0.010   |
| Han ethnicity, No. (%) | 638 (89.9%)  | 168 (92.8%)    | 402 (88.4%)       | 68 (93.2%)     | 0.152   | 719 (88.8%)    | 210 (90.9%)    | 471 (88.2%)       | 38 (84.4%)     | 0.354   |
| Any education, No. (%) | 457 (64.5%)  | 119 (65.8%)    | 294 (64.6%)       | 44 (60.3%)     | 0.707   | 108 (13.3%)    | 50 (21.7%)     | 55 (10.3%)        | 3 (6.7%)       | 0.000   |
| Smoking, No. (%)       |              |                |                   |                | 0.418   |                |                |                   |                | 0.800   |
| Current Smoker         | 265 (37.3%)  | 71 (39.2%)     | 170 (37.4%)       | 24 (32.9%)     |         | 30 (3.7%)      | 6 (2.6%)       | 23 (4.3%)         | 1 (2.2%)       |         |
| Past Smoker            | 109 (15.4%)  | 22 (12.2%)     | 71 (15.6%)        | 16 (21.9%)     |         | 16 (2.0%)      | 5 (2.2%)       | 11 (2.1%)         | 0              |         |
| Non-smoker             | 335 (47.3%)  | 88 (48.6%)     | 214 (47.0%)       | 33 (45.2%)     |         | 761 (94.3%)    | 219 (95.2%)    | 498 (93.6%)       | 44 (97.8%)     |         |
| Exercise, No. (%)      | 183 (26.2%)  | 55 (30.6%)     | 110 (24.6%)       | 18 (25.0%)     | 0.300   | 154 (19.3%)    | 41 (18.1%)     | 103 (19.5%)       | 10 (22.2%)     | 0.782   |
| Hypertension, No. (%)  | 125 (17.8%)  | 0              | 97 (21.6%)        | 28 (38.9%)     | 0.000   | 179 (22.6%)    | 0              | 153 (29.3%)       | 26 (57.8%)     | 0.000   |
| Diabetes, No. (%)      | 13 (1.8%)    | 3 (1.6%)       | 4 (0.9%)          | 6 (8.3%)       | 0.001   | 12 (1.5%)      | 0              | 10 (1.9%)         | 2 (4.4%)       | 0.013   |
| Heart disease, No. (%) | 42 (5.9%)    | 10 (5.5%)      | 27 (6.0%)         | 5 (6.9%)       | 0.921   | 62 (7.8%)      | 10 (4.5%)      | 40 (7.6%)         | 12 (26.7%)     | 0.000   |
| Stroke, No. (%)        | 33 (4.7%)    | 8 (4.4%)       | 18 (4.0%)         | 7 (10.0%)      | 0.105   | 45 (5.7%)      | 14 (6.2%)      | 29 (5.5%)         | 2 (4.4%)       | 0.878   |
| Pulmonary, No. (%)     | 74 (10.5%)   | 18 (10.0%)     | 45 (9.9%)         | 11 (15.3%)     | 0.374   | 49 (6.2%)      | 10 (4.4%)      | 38 (7.2%)         | 1 (2.2%)       | 0.181   |
| Arthritis, No. (%)     | 96 (13.6%)   | 18 (10.0%)     | 64 (14.2%)        | 14 (19.2%)     | 0.132   | 128 (16.0%)    | 44 (19.2%)     | 79 (15.0%)        | 5 (11.1%)      | 0.224   |
| Cancer, No. (%)        | 2 (0.3%)     | 1 (0.6%)       | 1 (0.2%)          | 0              | 0.591   | 6 (0.8%)       | 0              | 5 (1.0%)          | 1 (2.2%)       | 0.133   |

<sup>a</sup>Married vs. widowed, never married, and divorce.

**Table 3.**  
Association between allostatic load and mortality among males and females.

| <b>Males (N = 709)</b>        |                      |                       |                                       |                             |
|-------------------------------|----------------------|-----------------------|---------------------------------------|-----------------------------|
|                               |                      | Unadjusted            | Demographically adjusted <sup>a</sup> | Fully adjusted <sup>b</sup> |
| Events per 1,000 PYs (95% CI) |                      | Hazard ratio (95% CI) |                                       |                             |
| AL (continuously)             |                      | 1.75 (1.44, 2.12)     | 1.51 (1.24, 1.84)                     | 1.51 (1.23, 1.84)           |
| AL category                   |                      |                       |                                       |                             |
| Low (0-1)                     | 66.1 (50.7, 86.1)    | Ref.                  | Ref.                                  | Ref.                        |
| Medium (2-4)                  | 110.4 (96.3, 126.7)  | 1.68 (1.24, 2.26)     | 1.36 (1.00, 1.83)                     | 1.33 (0.98, 1.80)           |
| High (5-9)                    | 201.3 (153.0, 265.0) | 3.06 (2.09, 4.48)     | 2.29 (1.56, 3.37)                     | 2.18 (1.48, 3.22)           |
| <b>Females (N = 810)</b>      |                      |                       |                                       |                             |
|                               |                      | Unadjusted            | Demographically adjusted <sup>a</sup> | Fully adjusted <sup>b</sup> |
| Events per 1,000 PYs (95% CI) |                      | Hazard ratio (95% CI) |                                       |                             |
| AL (continuously)             |                      | 1.45 (1.23, 1.72)     | 1.16 (0.97, 1.37)                     | 1.16 (0.97, 1.38)           |
| AL category                   |                      |                       |                                       |                             |
| Low (0-1)                     | 121.1 (100.7, 145.6) | Ref.                  | Ref.                                  | Ref.                        |
| Medium (2-4)                  | 174.8 (156.9, 194.7) | 1.44 (1.17, 1.79)     | 1.14 (0.92, 1.42)                     | 1.11 (0.89, 1.38)           |
| High (5-9)                    | 252.6 (180.5, 353.5) | 2.11 (1.44, 3.10)     | 1.36 (0.93, 2.01)                     | 1.34 (0.91, 1.97)           |

Abbreviations: PY, person-year; CI, confidence interval; AL, allostatic load.

<sup>a</sup>Demographically adjusted model included age, ethnicity (Han vs. minority), education (any vs. none), and marital status (married vs. others).

<sup>b</sup>Fully adjusted model included age, ethnicity (Han vs. minority), education (any vs. none), and marital status (married vs. others), smoking (current vs. previous or non-smoke), exercise (yes vs. no), and chronic diseases such as pulmonary disease and arthritis.

1  
2  
3  
4  
5  
6  
7  
8  
9  
10  
11  
12  
13  
14  
15  
16  
17  
18  
19  
20  
21  
22  
23  
24  
25  
26  
27  
28  
29  
30  
31  
32  
33  
34  
35  
36  
37  
38  
39  
40  
41  
42  
43  
44  
45  
46  
47  
48  
49  
50  
51  
52  
53  
54  
55  
56  
57  
58  
59  
60

For peer review only

**Figure 1.**

Distribution of sample size by allostatic load score among males and females.

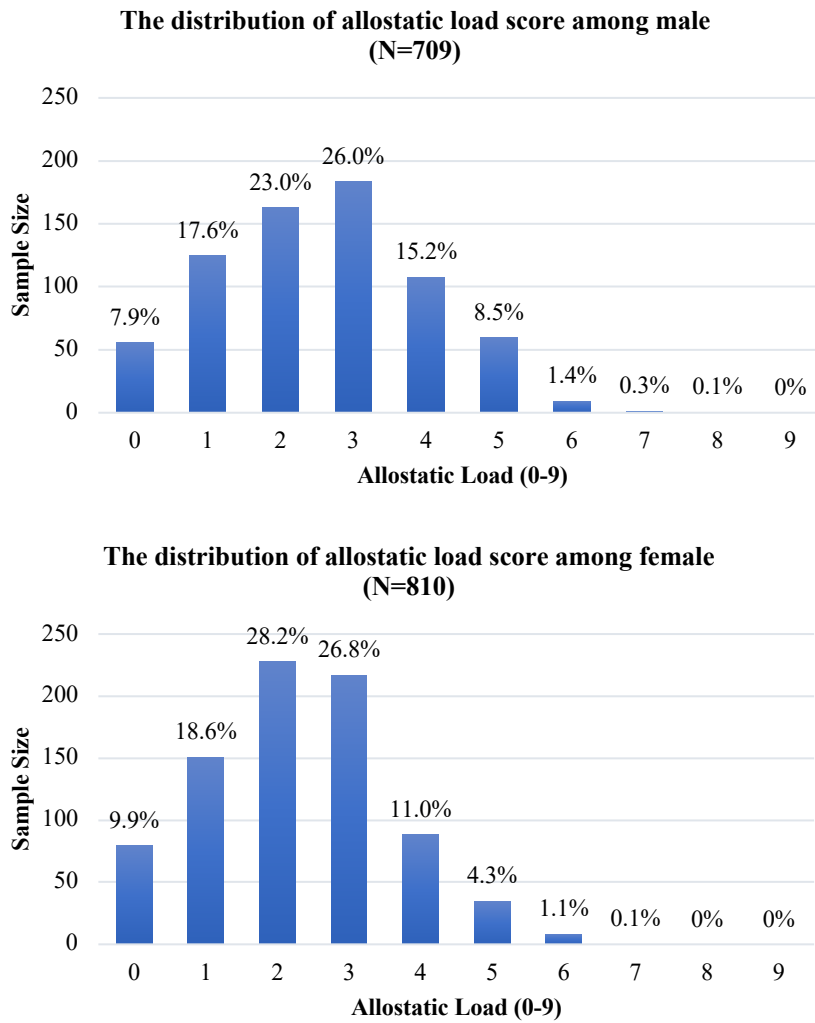

The above figure is the distribution of allostatic load score among male. The below figure is the distribution of allostatic load score among female. The distribution of the AL score (range: 0-9) is right skewed for both males and females; only 13 (1.8%) males and 10 (1.2%) females had a score of 6-9, respectively.

**Table S1.**

Baseline characteristics between included and excluded participants.

| Characteristics                | Included<br>(N=1,519) | Excluded <sup>b</sup><br>(N=920) | P-value |
|--------------------------------|-----------------------|----------------------------------|---------|
| Age, years, mean±SD            | 85.6±12.6             | 85.6± 13.5                       | 0.523   |
| Married <sup>a</sup> , No. (%) | 619 (40.8%)           | 361 (39.2%)                      | 0.461   |
| Han ethnicity, No. (%)         | 1,357 (89.3%)         | 836 (90.9%)                      | 0.223   |
| Any education, No. (%)         | 565 (37.2%)           | 384 (41.7%)                      | 0.026   |
| Smoking, No. (%)               |                       |                                  |         |
| Current Smoker                 | 295 (19.5%)           | 170 (18.7%)                      | 0.460   |
| Past Smoker                    | 125 (8.3%)            | 88 (9.7%)                        |         |
| Non-smoker                     | 1,096 (72.3%)         | 650 (71.6%)                      |         |
| Exercise, No. (%)              | 337 (22.5%)           | 271 (30.2%)                      | 0.000   |
| Hypertension, No. (%)          | 304 (20.3%)           | 201 (22.8%)                      | 0.153   |
| Diabetes, No. (%)              | 25 (1.7%)             | 19 (2.1%)                        | 0.405   |
| Heart disease, No. (%)         | 104 (6.9%)            | 48 (5.4%)                        | 0.138   |
| Stroke, No. (%)                | 78 (5.2%)             | 62 (6.9%)                        | 0.077   |
| Pulmonary, No. (%)             | 123 (8.2%)            | 73 (8.2%)                        | 0.994   |
| Arthritis, No. (%)             | 224 (14.9%)           | 152 (17.1%)                      | 0.145   |
| Cancer, No. (%)                | 8 (0.5%)              | 3 (0.3%)                         | 0.341   |

<sup>a</sup>Married vs. widowed, never married, and divorced.<sup>b</sup>Excluded criteria includes incomplete data on AL biomarkers, no follow-up data, missing data or extreme values of the biomarkers, and aged less than 60 years.



**Table S2.**

The cut-points for excluding SBP, DBP, BMI, and heart rate.

| <b>Biomarkers</b>                  | <b>Cut-points</b> |
|------------------------------------|-------------------|
| Body mass index, kg/m <sup>2</sup> | >40               |
| Heart rate, beats/min              | >220              |
| Systolic blood pressure, mmHg      | >200 or <90       |
| Diastolic blood pressure, mmHg     | >110 or <60       |

**Table S3.**  
Sensitivity analysis.

| <b>Males (N = 709)</b>        |                      |                       |                                       |                             |
|-------------------------------|----------------------|-----------------------|---------------------------------------|-----------------------------|
| Events per 1,000 PYs (95% CI) |                      | Unadjusted            | Demographically adjusted <sup>a</sup> | Fully adjusted <sup>b</sup> |
|                               |                      | Hazard ratio (95% CI) |                                       |                             |
| AL (continuously)             |                      | 1.28 (1.18, 1.38)     | 1.18 (1.09, 1.28)                     | 1.18 (1.08, 1.27)           |
| AL category                   |                      |                       |                                       |                             |
| Low (0-1)                     | 68.1 (53.4, 86.9)    | Ref.                  | Ref.                                  | Ref.                        |
| Medium (2-4)                  | 115.4 (100.7, 132.1) | 1.70 (1.29, 2.25)     | 1.45 (1.10, 1.93)                     | 1.41 (1.06, 1.88)           |
| High (5-9)                    | 214.7 (154.8, 297.6) | 3.18 (2.11, 4.78)     | 2.33 (1.54, 3.53)                     | 2.35 (1.55, 3.56)           |
| <b>Females (N = 810)</b>      |                      |                       |                                       |                             |
| Events per 1,000 PYs (95% CI) |                      | Unadjusted            | Demographically adjusted <sup>a</sup> | Fully adjusted <sup>b</sup> |
|                               |                      | Hazard ratio (95% CI) |                                       |                             |
| AL (continuously)             |                      | 1.22 (1.14, 1.31)     | 1.10 (1.02, 1.18)                     | 1.09 (1.01, 1.17)           |
| AL category                   |                      |                       |                                       |                             |
| Low (0-1)                     | 113.7 (96.2, 134.4)  | Ref.                  | Ref.                                  | Ref.                        |
| Medium (2-4)                  | 191.7 (171.8, 213.9) | 1.70 (1.39, 2.08)     | 1.29 (1.05, 1.57)                     | 1.27 (1.03, 1.56)           |
| High (5-9)                    | 267.4 (168.5, 424.5) | 2.40 (1.47, 3.93)     | 1.37 (0.83, 2.25)                     | 1.39 (0.85, 2.29)           |

Abbreviations: PY, person-year; CI, confidence interval; AL, allostatic load.

<sup>a</sup>Demographically adjusted model included age, ethnicity (Han vs. minority), education (any vs. none), and marital status (married vs. others).

<sup>b</sup>Fully adjusted model included age, ethnicity (Han vs. minority), education (any vs. none), and marital status (married vs. others), smoking (current vs. previous or non-smoke), exercise (yes vs. no), and chronic diseases such as pulmonary disease and arthritis.

**Table S4.**  
Compare participant who lost follow up data and who included in study.

| <b>Characteristics</b>         | <b>Included<br/>(N=1,519)</b> | <b>Loss follow up<br/>(N=522)</b> | <b>P-value</b> |
|--------------------------------|-------------------------------|-----------------------------------|----------------|
| Age, years, mean±SD            | 85.6±12.6                     | 87.3± 13.3                        | 0.98           |
| Married <sup>a</sup> , No. (%) | 619 (40.8%)                   | 180 (34.8%)                       | 0.02           |
| Han ethnicity, No. (%)         | 1,357 (89.3%)                 | 467 (90.2%)                       | 0.60           |
| Any education, No. (%)         | 565 (37.2%)                   | 202 (39.0%)                       | 0.47           |
| Smoking, No. (%)               |                               |                                   |                |
| Current Smoker                 | 295 (19.5%)                   | 88 (17.3%)                        | 0.54           |
| Past Smoker                    | 125 (8.3%)                    | 45 (8.8%)                         |                |
| Non-smoker                     | 1,096 (72.3%)                 | 376 (73.9%)                       |                |
| Exercise, No. (%)              | 337 (22.5%)                   | 129 (25.6%)                       | 0.15           |
| Hypertension, No. (%)          | 304 (20.3%)                   | 109 (21.9%)                       | 0.45           |
| Diabetes, No. (%)              | 25 (1.7%)                     | 7 (1.4%)                          | 0.68           |
| Heart disease, No. (%)         | 104 (6.9%)                    | 25 (5.0%)                         | 0.13           |
| Stroke, No. (%)                | 78 (5.2%)                     | 44 (8.8%)                         | 0.004          |
| Pulmonary, No. (%)             | 123 (8.2%)                    | 39 (7.7%)                         | 0.77           |
| Arthritis, No. (%)             | 224 (14.9%)                   | 79 (15.8%)                        | 0.62           |
| Cancer, No. (%)                | 8 (0.5%)                      | 2 (0.4%)                          | 0.72           |

<sup>a</sup>Married vs. widowed, never married, and divorced.

zSTROBE Statement—Checklist of items that should be included in reports of *cohort studies*

|                              | Item No | Recommendation                                                                                                                                                                                                                                                                                                         | Page No |
|------------------------------|---------|------------------------------------------------------------------------------------------------------------------------------------------------------------------------------------------------------------------------------------------------------------------------------------------------------------------------|---------|
| <b>Title and abstract</b>    | 1       | (a) Indicate the study's design with a commonly used term in the title or the abstract<br>(b) Provide in the abstract an informative and balanced summary of what was done and what was found                                                                                                                          | 1-2     |
| <b>Introduction</b>          |         |                                                                                                                                                                                                                                                                                                                        |         |
| Background/rationale         | 2       | Explain the scientific background and rationale for the investigation being reported                                                                                                                                                                                                                                   | 4       |
| Objectives                   | 3       | State specific objectives, including any prespecified hypotheses                                                                                                                                                                                                                                                       | 5       |
| <b>Methods</b>               |         |                                                                                                                                                                                                                                                                                                                        |         |
| Study design                 | 4       | Present key elements of study design early in the paper                                                                                                                                                                                                                                                                | 5-6     |
| Setting                      | 5       | Describe the setting, locations, and relevant dates, including periods of recruitment, exposure, follow-up, and data collection                                                                                                                                                                                        | 6       |
| Participants                 | 6       | (a) Give the eligibility criteria, and the sources and methods of selection of participants. Describe methods of follow-up<br>(b) For matched studies, give matching criteria and number of exposed and unexposed                                                                                                      | 6-7     |
| Variables                    | 7       | Clearly define all outcomes, exposures, predictors, potential confounders, and effect modifiers. Give diagnostic criteria, if applicable                                                                                                                                                                               | 7-9     |
| Data sources/<br>measurement | 8*      | For each variable of interest, give sources of data and details of methods of assessment (measurement). Describe comparability of assessment methods if there is more than one group                                                                                                                                   | 7-9     |
| Bias                         | 9       | Describe any efforts to address potential sources of bias                                                                                                                                                                                                                                                              | 7       |
| Study size                   | 10      | Explain how the study size was arrived at                                                                                                                                                                                                                                                                              | 6       |
| Quantitative variables       | 11      | Explain how quantitative variables were handled in the analyses. If applicable, describe which groupings were chosen and why                                                                                                                                                                                           | 7-9     |
| Statistical methods          | 12      | (a) Describe all statistical methods, including those used to control for confounding<br>(b) Describe any methods used to examine subgroups and interactions<br>(c) Explain how missing data were addressed<br>(d) If applicable, explain how loss to follow-up was addressed<br>(e) Describe any sensitivity analyses | 9       |
| <b>Results</b>               |         |                                                                                                                                                                                                                                                                                                                        |         |
| Participants                 | 13*     | (a) Report numbers of individuals at each stage of study—eg numbers potentially eligible, examined for eligibility, confirmed eligible, included in the study, completing follow-up, and analysed<br>(b) Give reasons for non-participation at each stage<br>(c) Consider use of a flow diagram                        | 10      |
| Descriptive data             | 14*     | (a) Give characteristics of study participants (eg demographic, clinical, social) and information on exposures and potential confounders<br>(b) Indicate number of participants with missing data for each variable of interest<br>(c) Summarise follow-up time (eg, average and total amount)                         | 10      |
| Outcome data                 | 15*     | Report numbers of outcome events or summary measures over time                                                                                                                                                                                                                                                         | 11-12   |

|    |                          |    |                                                                                                                                                                                                              |       |
|----|--------------------------|----|--------------------------------------------------------------------------------------------------------------------------------------------------------------------------------------------------------------|-------|
| 1  | Main results             | 16 | (a) Give unadjusted estimates and, if applicable, confounder-adjusted estimates and their precision (eg, 95% confidence interval). Make clear which confounders were adjusted for and why they were included | 11-12 |
| 2  |                          |    | (b) Report category boundaries when continuous variables were categorized                                                                                                                                    |       |
| 3  |                          |    | (c) If relevant, consider translating estimates of relative risk into absolute risk for a meaningful time period                                                                                             |       |
| 4  |                          |    |                                                                                                                                                                                                              |       |
| 5  |                          |    |                                                                                                                                                                                                              |       |
| 6  |                          |    |                                                                                                                                                                                                              |       |
| 7  |                          |    |                                                                                                                                                                                                              |       |
| 8  |                          |    |                                                                                                                                                                                                              |       |
| 9  | Other analyses           | 17 | Report other analyses done—eg analyses of subgroups and interactions, and sensitivity analyses                                                                                                               | 11-12 |
| 10 |                          |    |                                                                                                                                                                                                              |       |
| 11 | <b>Discussion</b>        |    |                                                                                                                                                                                                              |       |
| 12 |                          |    |                                                                                                                                                                                                              |       |
| 13 | Key results              | 18 | Summarise key results with reference to study objectives                                                                                                                                                     | 12    |
| 14 | Limitations              | 19 | Discuss limitations of the study, taking into account sources of potential bias or imprecision. Discuss both direction and magnitude of any potential bias                                                   | 15    |
| 15 |                          |    |                                                                                                                                                                                                              |       |
| 16 | Interpretation           | 20 | Give a cautious overall interpretation of results considering objectives, limitations, multiplicity of analyses, results from similar studies, and other relevant evidence                                   | 12-14 |
| 17 |                          |    |                                                                                                                                                                                                              |       |
| 18 |                          |    |                                                                                                                                                                                                              |       |
| 19 | Generalisability         | 21 | Discuss the generalisability (external validity) of the study results                                                                                                                                        | 15    |
| 20 |                          |    |                                                                                                                                                                                                              |       |
| 21 | <b>Other information</b> |    |                                                                                                                                                                                                              |       |
| 22 | Funding                  | 22 | Give the source of funding and the role of the funders for the present study and, if applicable, for the original study on which the present article is based                                                | 17-18 |
| 23 |                          |    |                                                                                                                                                                                                              |       |
| 24 |                          |    |                                                                                                                                                                                                              |       |
| 25 |                          |    |                                                                                                                                                                                                              |       |

\*Give information separately for exposed and unexposed groups.

**Note:** An Explanation and Elaboration article discusses each checklist item and gives methodological background and published examples of transparent reporting. The STROBE checklist is best used in conjunction with this article (freely available on the Web sites of PLoS Medicine at <http://www.plosmedicine.org/>, Annals of Internal Medicine at <http://www.annals.org/>, and Epidemiology at <http://www.epidem.com/>). Information on the STROBE Initiative is available at <http://www.strobe-statement.org>.

# BMJ Open

## The Association between Allostatic Load and Mortality among Chinese Older Adults: The Chinese Longitudinal Health and Longevity Study

|                                 |                                                                                                                                                                                                                                                                                                                                                                                             |
|---------------------------------|---------------------------------------------------------------------------------------------------------------------------------------------------------------------------------------------------------------------------------------------------------------------------------------------------------------------------------------------------------------------------------------------|
| Journal:                        | <i>BMJ Open</i>                                                                                                                                                                                                                                                                                                                                                                             |
| Manuscript ID                   | bmjopen-2020-045369.R1                                                                                                                                                                                                                                                                                                                                                                      |
| Article Type:                   | Original research                                                                                                                                                                                                                                                                                                                                                                           |
| Date Submitted by the Author:   | 27-Mar-2021                                                                                                                                                                                                                                                                                                                                                                                 |
| Complete List of Authors:       | Zhang, Tianhang; Duke Kunshan University, Global Health Research Center; Imperial College London<br>Yan, Lijing L; Duke Kunshan University, Global Health Research Center; Duke Global Health Institute<br>Chen, Hua-Shuai; Duke University,<br>Jin, Hai-Yu; Duke Kunshan University, Global Health Research Center<br>wu, chen kai; Duke Kunshan University, Global Health Research Center |
| <b>Primary Subject Heading</b>: | Epidemiology                                                                                                                                                                                                                                                                                                                                                                                |
| Secondary Subject Heading:      | Geriatric medicine, Epidemiology                                                                                                                                                                                                                                                                                                                                                            |
| Keywords:                       | MENTAL HEALTH, PUBLIC HEALTH, EPIDEMIOLOGY                                                                                                                                                                                                                                                                                                                                                  |
|                                 |                                                                                                                                                                                                                                                                                                                                                                                             |

SCHOLARONE™  
Manuscripts



I, the Submitting Author has the right to grant and does grant on behalf of all authors of the Work (as defined in the below author licence), an exclusive licence and/or a non-exclusive licence for contributions from authors who are: i) UK Crown employees; ii) where BMJ has agreed a CC-BY licence shall apply, and/or iii) in accordance with the terms applicable for US Federal Government officers or employees acting as part of their official duties; on a worldwide, perpetual, irrevocable, royalty-free basis to BMJ Publishing Group Ltd ("BMJ") its licensees and where the relevant Journal is co-owned by BMJ to the co-owners of the Journal, to publish the Work in this journal and any other BMJ products and to exploit all rights, as set out in our [licence](#).

The Submitting Author accepts and understands that any supply made under these terms is made by BMJ to the Submitting Author unless you are acting as an employee on behalf of your employer or a postgraduate student of an affiliated institution which is paying any applicable article publishing charge ("APC") for Open Access articles. Where the Submitting Author wishes to make the Work available on an Open Access basis (and intends to pay the relevant APC), the terms of reuse of such Open Access shall be governed by a Creative Commons licence – details of these licences and which [Creative Commons](#) licence will apply to this Work are set out in our licence referred to above.

Other than as permitted in any relevant BMJ Author's Self Archiving Policies, I confirm this Work has not been accepted for publication elsewhere, is not being considered for publication elsewhere and does not duplicate material already published. I confirm all authors consent to publication of this Work and authorise the granting of this licence.

1  
2  
3 **The Association between Allostatic Load and Mortality among Chinese Older Adults:**  
4  
5 **The Chinese Longitudinal Health and Longevity Study**  
6  
7  
8  
9

10 Tianhang Zhang (MSc.)<sup>1,2</sup>, Lijing L. Yan (PhD, Prof.)<sup>1</sup>, Huashuai Chen (PhD, Dr.)<sup>3</sup>, Hai-Yu  
11  
12 Jin (MA)<sup>1</sup>, Chenkai Wu (PhD, Prof, Assistant.)<sup>1</sup>  
13  
14  
15  
16

17 <sup>1</sup> Global Health Research Center, Duke Kunshan University, Jiangsu, China, <sup>2</sup>Imperial  
18  
19 College London, United Kingdom, <sup>3</sup> Center for the Study of Aging and Human Development  
20  
21 and the Geriatric Division of School of Medicine, Duke University, Durham, North Carolina  
22  
23  
24  
25  
26  
27

28 **Corresponding Author:**  
29

30 Chenkai Wu, PhD, MPH, MS  
31

32 Global Health Research Center  
33

34 Duke Kunshan University  
35

36 Academic Building 3038  
37

38 No. 8 Duke Avenue, Kunshan, Jiangsu, China, 215316  
39

40 Phone: (+86) 512 36657235  
41

42 Email: [chenkai.wu@dukekunshan.edu.cn](mailto:chenkai.wu@dukekunshan.edu.cn)  
43  
44  
45  
46  
47

48 Word count: 3736  
49  
50  
51  
52  
53  
54  
55  
56  
57  
58  
59  
60



1  
2  
3 **The Association between Allostatic Load and Mortality among Chinese Older Adults:**  
4  
5 **The Chinese Longitudinal Health and Longevity Study**  
6  
7

8 **Abstract**  
9

10 **Background:** Allostatic load has shown that high burden of AL is associated with increased  
11 risk of adverse outcomes, but little attention has been paid to China with largest aging  
12 population in the world.  
13  
14  
15

16  
17  
18  
19 **Objective:** This study is to examine the association between allostatic load (AL) and all-cause  
20 mortality among Chinese adults aged at least 60 years.  
21  
22  
23

24  
25  
26 **Design:** Population-based prospective cohort study.  
27  
28  
29

30  
31 **Setting:** In 2011-2012, an ancillary study, in which a blood test was added, including a total of  
32 2,439 participants, was conducted in eight longevity areas in the Chinese Longitudinal Healthy  
33 Longevity Survey.  
34  
35  
36

37  
38  
39  
40 **Participants:** The final analytic sample consisted of 1,519 participants (mean  $\pm$  SD age: men  
41 80.5 $\pm$ 11.3 years; women 90.2 $\pm$ 11.8 years; and 53% women).  
42  
43  
44

45  
46  
47 **Primary outcome measure:** Cox models were used to examine the association between AL  
48 and mortality among men and women, separately. Analysis were also adjusted for potential  
49 confounders including age, ethnicity, education, and marital status, smoking and exercise.  
50  
51  
52  
53  
54  
55  
56  
57  
58  
59  
60

1  
2  
3 **Results:** Male with a medium AL burden (score: 2-4) and high AL burden (score: 5-9) had a  
4  
5 33% and 118% higher hazard of death, respectively, than those with a low AL burden (score:  
6  
7 0-1). We did not find significant difference between females with different levels of AL burden.  
8  
9

10  
11  
12 **Conclusion:** Higher AL burden was associated with increased all-cause mortality among  
13  
14 Chinese men aged at least 60 years. However, we did not find strong association among women.  
15  
16 In conclusion, Intervention programs targeting modifiable components of the AL burden may  
17  
18 help prolong lifespan for older adults, especially men, in China.  
19  
20  
21  
22

23  
24 **Keywords:** Allostatic load; Mortality; Chinese; Elderly; Cohort study; disease burden.  
25  
26

## 27 ARTICLE SUMMARY

### 28 **Strengths and limitations of this study**

- 29  
30  
31  
32  
33  
34  
35  
36  
37  
38  
39  
40  
41  
42  
43  
44  
45  
46  
47  
48  
49  
50  
51  
52  
53  
54  
55  
56  
57  
58  
59  
60
- This is the first study to investigate the association between AL and mortality using a Chinese population.
  - The CLHLS dataset that is a large nationally representative old population survey in China.
  - The updated quartile risk method for biomarkers BMI, total cholesterol, and triglyceride among older adults.
  - Lack of primary neuroendocrine biomarkers such as cortisol in constructing the AL score, which may influence the finding presented.
  - There is huge loss to follow up (>20%; 552 of 2439), although only 3 to 7-year range of follow up (2011 to 2014-18), which may underestimate the association.

1  
2  
3 1 **The Association between Allostatic Load and Mortality among Chinese Older Adults:**  
4  
5 2 **The Chinese Longitudinal Health and Longevity Study**  
6  
7  
8  
9

10 4 BACKGROUND  
11

12 5 Allostatic load (AL) is conceptualized as the cumulative wear and tear on multiple  
13  
14 6 physiological systems resulting from repeated adaptation to stressors [1,2,3,4]. In the absence  
15  
16 7 of a gold standard, many operational definitions of AL have been proposed. The most  
17  
18 8 commonly used construct of AL was developed by Seeman and colleagues who have used two  
19  
20 9 categories of biomarkers for quantifying AL [4,5]. The first category (called primary mediators)  
21  
22 10 includes biomarkers the body releases in response to stress, such as cortisol and  
23  
24 11 dehydroepiandrosterone sulphate (DHEA-S); the second category comprises secondary  
25  
26 12 outcomes that result from the effects of primary mediators. Examples of biomarkers are blood  
27  
28 13 pressure (BP), cholesterol, and the waist-hip ratio [4].  
29  
30  
31  
32  
33  
34

35 15 A number of studies identified that a high burden of AL is associated with increased risk of  
36  
37 16 adverse outcomes including cardiovascular disease, functional decline, and mortality among  
38  
39 17 the older adults [1,2,6,7,8,9,10]. For example, in a 7-year longitudinal study conducted in 2006,  
40  
41 18 increased AL score was associated with higher mortality among older population [8]. In a  
42  
43 19 cohort study of 1,023 community-dwelling older adults in Taiwan, researchers found that  
44  
45 20 higher AL score was related with higher death rate [7]. Additionally, some studies found that  
46  
47 21 women and men experienced chronic stress in different ways. For example, Yang et al in 2011  
48  
49 22 revealed gender differences in the AL biomarkers and the age trajectories of physiological  
50  
51 23 dysregulation [11]. Women had a higher level of inflammation biomarkers but lower risk of  
52  
53 24 cardiovascular disease (CVD) than men. Another study from Tampubolon and Maharani in  
54  
55 25 2018 among the older population found that AL score increased in sex difference [12].  
56  
57  
58  
59  
60

1  
2  
3 26 Compared with men, women showed an advantage in life expectancy [12]. Taken together,  
4  
5 27 these results suggest the use of sex-specific cut-off points for AL biomarkers in future research.  
6  
7  
8 28

9  
10 29 A number of studies have examined the association between AL and mortality among older  
11  
12 30 adults. However, little attention has been paid to less developed regions, including China – the  
13  
14 31 most populous country with the largest aging population in the world. In 2019, there were 249  
15  
16 32 million adults aged 60 years or above in China, accounting for 17.3% of its total population,  
17  
18 33 and this number is projected to almost double in 2050, reaching 487 million [13,14].  
19  
20 34 Understanding the relationship between AL and mortality in less developed countries is  
21  
22 35 beneficial for leading to interventions, which could be helpful to change unhealthy lifestyles,  
23  
24 36 decrease morbidity and mortality among the older population. In addition, less studies focus  
25  
26 37 on sex-specific cut off points for calculating AL index, this study will conduct sex-specific  
27  
28 38 studies, which may closely reflect AL score among the older population.  
29  
30  
31  
32  
33  
34

35 40 In this study, we used a large cohort study to examine the association between AL and all-  
36  
37 41 causes mortality among Chinese men and women aged at least 60 years. We hypothesized that  
38  
39 42 a higher burden of AL would be associated with increased risk of all-cause mortality among  
40  
41 43 both older men and women in China.  
42  
43  
44  
45  
46

## 47 45 METHODS

### 48 46 **Data and Study Participants**

49 47 We used data from the Chinese Longitudinal Healthy Longevity Survey (CLHLS), an ongoing  
50  
51 48 prospective, longitudinal study with the largest sample of the oldest old in China. Half of the  
52  
53 49 counties and cities in 22 of the 31 provinces in China (covering 85% of the population) were  
54  
55 50 randomly selected through a multistage cluster sampling approach. A wide range of socio-  
56  
57  
58  
59  
60

1  
2  
3 51 demographic, lifestyle, and health measures were collected in the CLHLS. The baseline survey  
4  
5 52 was conducted in 1998 and participants who were alive were re-interviewed in each follow-up  
6  
7 53 survey (2000, 2002, 2005, 2008-2009, 2011-2012, 2014, and 2017-2018). In 2011-2012, an  
8  
9 54 ancillary study, in which a blood test was added, was conducted in eight longevity areas:  
10  
11 55 Laizhou City in Shandong Province, Xiayi County in Henan Province, Zhongxiang City in  
12  
13 56 Hubei Province, Mayang County in Hunan Province, Yongfu County in Guangxi Autonomous  
14  
15 57 Area, Sanshui District in Guangdong Province, Chengmai County in Hainan Province, and  
16  
17 58 Rudong County in Jiangsu Province. The Research Ethics Committees of Peking University  
18  
19 59 and Duke University granted approval for the Protection of Human Subjects for the CLHLS.  
20  
21 60 All study participants gave informed consent. A more detailed description of the recruitment  
22  
23 61 strategy and study design of the CLHLS has been published elsewhere [15,16,17]. A total of  
24  
25 62 8,959 individuals were included at baseline (1998). 1998 baseline survey, which was extended  
26  
27 63 to 11,162 in 2000, it was found that almost 30 percent died before 2002 interview and  
28  
29 64 approximately 14 percent were lost that was higher than the attrition rate between 1998 and  
30  
31 65 2000 wave (9.6 percent); the number of participants were extend to 16,064 in 2002, and about  
32  
33 66 13.8 percent were lost between 2002 and 2005; the number of interviewed were 15,638 in 2005,  
34  
35 67 and about 13.2 percent were lost between 2005 and 2008-2009; the number of participants were  
36  
37 68 extended to 16,540, and approximately 17.7 percent were lost between 2008-2009 and 2011-  
38  
39 69 2012; the total number of interviewed participants were 9765 in 2011-2012 [18].  
40  
41  
42  
43  
44  
45  
46  
47  
48

49 71 A total of 2,439 persons contributed blood samples in the ancillary study (2011-2012).  
50  
51 72 Participants were excluded from the analytic sample if they had (i) incomplete data on any  
52  
53 73 biomarkers for constructing AL (n = 251), (ii) no follow-up data (time to death or censorship  
54  
55 74 was undetermined; n = 552), (iii) had extreme values on the biomarkers (n = 109; Table S1),  
56  
57 75 or (iv) were less than 60 years old (n=16). The final analytic sample consisted of 1,519  
58  
59  
60

1  
2  
3 76 participants. We did not observe appreciable differences in age, ethnicity, marital status,  
4  
5 77 smoking, or chronic conditions between the analytic sample and those excluded (n = 920; Table  
6  
7 78 S2). Compared to the analytic sample, excluded persons had a higher education level and  
8  
9 79 higher prevalence of exercise. In addition, compared to people who were lost follow up, the  
10  
11 80 included people had higher prevalence of married, and higher prevalence of stroke; we did not  
12  
13 81 observe appreciable differences in age, ethnicity, smoking, exercise, hypertension, diabetes,  
14  
15 82 heart disease, pulmonary, arthritis, and cancer between both (Table S3).  
16  
17  
18  
19  
20  
21  
22

### 23 84 **Calculation of AL Score**

24 85 Based on previous research [3,7,19,20] and availability of data in the CLHLS, we selected nine  
25  
26 86 biomarkers to construct AL: heart rate, systolic BP (SBP), and diastolic BP (DBP), body mass  
27  
28 87 index (BMI), total cholesterol, high-density lipoprotein (HDL) cholesterol, glucose,  
29  
30 88 triglyceride, and C-reactive protein (CRP). BMI, heart rate, SBP, and DBP were collected from  
31  
32 89 physical examinations. BMI was calculated as body weight (kilograms) divided by height  
33  
34 90 (meters) squared. SBP and DBP were measured by a mercury sphygmomanometer with an  
35  
36 91 appropriately sized cuff, taken in the seated position after 5 minutes of quiet rest under the  
37  
38 92 supervision of trained research assistants. We used the average of two measurements for further  
39  
40 93 analyses. Blood samples were used for assays of the level of the total cholesterol, HDL  
41  
42 94 cholesterol, glucose, triglyceride, and CRP.  
43  
44  
45  
46  
47  
48  
49  
50  
51  
52  
53  
54  
55  
56  
57  
58  
59  
60

96 To be in line with previous studies [4,10,21,22], we used the highest quartile for heart rate,  
97  
98 SBP, DBP, glucose, and CRP and the lowest quartile for HDL cholesterol to define the high-  
99  
100 risk group (coded 1). Because BMI, total cholesterol, and triglyceride were inversely associated  
with mortality among older adults, especially the oldest old [23, 24, 25], we used the lowest  
quartile to define the high-risk group for these three biomarkers. For participants who self-

1  
2  
3 101 reported having been diagnosed with hypertension and heart disease, we classified their SBP,  
4  
5 102 DBP, and glucose into the high-risk category. Similarly, we classified participants' glucose  
6  
7 103 into the high-risk group if they self-reported having been diagnosed with diabetes. The  
8  
9 104 identification of risk quartiles of biomarkers is commonly used to construct AL index [ 5, 26].  
10  
11 105 The cut-points of all nine AL components by men and women were presented in Table 1. We  
12  
13 106 constructed the AL score based on the count of biomarkers falling in the high-risk group,  
14  
15 107 ranging from 0 (lowest) to 9 (highest). To be in line with previous studies [27], we then  
16  
17 108 considered using similar cut-off points, classifying the AL score into three categories based on  
18  
19 109 sample distribution: 0-1 (low burden), 2-4 (medium burden), and 5-9 (high burden).  
20  
21  
22  
23  
24  
25

110

### 111 **Mortality**

112 The outcome was all-cause mortality. Vital status and date of death (for persons who died by  
113 the end of the study) was ascertained by the close family member or village doctor of the  
114 deceased participant during the follow-up survey in 2014 and 2017-2018. We calculated the  
115 survival time from the date of the baseline interview to the date of last interview (censored) or  
116 the death date.

117

### 118 **Covariates**

119 Demographic and lifestyle characteristics were collected by interview, including age, sex,  
120 ethnicity, education, and marital status, smoking status, and physical exercise. We divided  
121 ethnicity into Han and others (minority groups). Years of education were dichotomized as any  
122 (one year or more) and no education, which is commonly way used in CLHLS study [28, 29].  
123 Marital status was dichotomized as married and others (widowed, not married, and divorced).  
124 Cigarette smoking was categorized as current, past, and non-smoker. Information of exercise  
125 was collected using the question "Do you do exercise at present?" and dichotomized into yes

60

1  
2  
3 126 or no. Chronic conditions were measured based on self-reported physician's diagnosis,  
4  
5 127 including hypertension, diabetes, heart disease, stroke, pulmonary disease (including bronchitis,  
6  
7 128 emphysema, pneumonia and asthma), arthritis, and cancer.  
8  
9

10 129

### 11 12 130 **Statistical Analyses**

13  
14  
15 131 All analyses were conducted separately for males and females. We first presented the relative  
16  
17 132 frequency of the AL score using histograms and calculated the mean AL score. Then, we  
18  
19 133 described the baseline characteristics of the study sample by AL burden (low, medium, and  
20  
21 134 high) using means and SDs for continuous variables and counts and percentages for categorical  
22  
23 135 variables. Characteristics were compared across the three AL categories using analyses of  
24  
25 136 variance for continuous variables and chi-square tests for categorical variables.  
26  
27  
28  
29

30 137

31 138 We calculated the death rates across three AL categories (low, medium, and high burden). We  
32  
33 139 used the Cox proportional hazards model to determine the unadjusted and adjusted associations  
34  
35 140 between the AL and all-cause mortality. Age, sex, education, and marital status were included  
36  
37 141 in the demographically adjusted models; smoking status, physical exercise, and chronic status  
38  
39 142 including pulmonary disease and arthritis were added in the fully adjusted models. We modeled  
40  
41 143 AL both continuously and in categories.  
42  
43  
44

45 144

46  
47 145 Furthermore, one sensitivity analysis was undertaken, which aimed to exam if the model results  
48  
49 146 were influenced when we did not use self-reported hypertension or diabetes to classify  
50  
51 147 participants' risk category for BP or glucose.  
52  
53

54 148

55  
56 149 All tests were two-sided with a significance level of P-value less than 0.05. We conducted all  
57  
58 150 analyses using STATA version 16.0 (Stata Corp, College Station, TX).  
59  
60



151

## 152 **Study participants and public involvement**

153 This research was done without study participant involvement. Study participants were not  
154 invited to comment on the study design and were not consulted to develop participant-relevant  
155 outcomes or interpret the results. Participants were not invited to contribute to the writing or  
156 editing of this document for readability or accuracy.

157

## 158 **RESULTS**

### 159 **Distribution of Allostatic Load Categories**

160 The distribution of the AL score (range: 0-9) is right-skewed for both males and females; only  
161 13 (1.8%) males and 10 (1.2%) females had a score of 6-9, respectively (Figure 1). The mean  
162 AL score was 2.56 (SD=1.47) for males and 2.28 (SD=1.34) for females. For males, 25.5%,  
163 64.2%, and 10.3% had an AL score of 0-1, 2-4, and 5-9, respectively. For females, 28.5%,  
164 65.9%, and 5.6% had an AL score of 0-1 (low burden), 2-4 (medium burden), and 5-9 (high  
165 burden), respectively.

166

### 167 **Demographic Characteristics**

168 A total of 709 (46.7%) males were included. The average age for males with an AL score of  
169 0-1 (low burden), 2-4 (medium burden), 5-9 (high burden) was 77.6, 81.0, and 84.1 years,  
170 respectively (P = 0.042). In addition, we observed significant differences in the prevalence  
171 hypertension and diabetes by different AL burden among males.

172

173 The study sample included 810 (53.3%) females. The average age for females with an AL score  
174 of 0-1 (low burden), 2-4 (medium burden), 5-9 (high burden) was 87.0, 91.3, and 93.6 years,  
175 respectively (P < 0.05; Table 2). Compared with men, women were older, less educated, had a

1  
2  
3 176 lower prevalence of smoking, and were less physically active. Females with a lower AL were  
4  
5 177 more likely to be married and have any education than woman with higher AL score; they also  
6  
7  
8 178 had a lower prevalence of hypertension, diabetes, and heart disease. We did not observe  
9  
10 179 significant difference in ethnicity, smoking, physical exercise, stroke, pulmonary disease,  
11  
12 180 arthritis, and cancer across AL burden (low, medium, and high) among females.  
13  
14  
15 181

### 16 17 182 **Association between Allostatic Load and Mortality among Males**

18  
19 183 A total of 310 males died; the overall death rate was 105.7 per 1,000 person-years. Males with  
20  
21 184 an AL score of 0-1 (low), 2-4 (medium), and 5-9 (high) had a death rate of 66.1, 110.4.6, and  
22  
23  
24 185 201.3 per 1,000 person-years, respectively (Table 3).  
25  
26 186

27  
28 187 In the unadjusted Cox model, per unit higher AL score was significantly associated with a 75%  
29  
30 188 higher hazard of death among males (95% CI: 44%, 112%; Table 3). The association slightly  
31  
32  
33 189 attenuated but persisted in the full adjusted model (hazard ratio [HR] = 1.51, 95% CI: 1.23,  
34  
35 190 1.84). When modelled in categories, in the unadjusted model, the hazard of death of male with  
36  
37 191 the medium AL burden (score: 2-4) was 1.68 times than hazard of death of those with a lower  
38  
39 192 AL burden (score: 0-1); Male with a high AL burden (Score: 5-9) had a more than three-fold  
40  
41 193 higher hazard of death than those with a lower AL burden (score: 0-1). These associations  
42  
43  
44 194 persisted after adjustment of socio-demographics and lifestyles. In the fully adjusted model,  
45  
46 195 males with a medium AL burden (score: 2-4) had a 33% higher hazard of death than those with  
47  
48 196 a low AL burden (score: 0-1). Males with a high AL burden (score: 5-9) had a more than two-  
49  
50 197 fold higher hazard of death than those with a low AL burden (score: 0-1). Results did not  
51  
52  
53 198 change substantially in the sensitivity analyses (Tables S4).  
54  
55  
56 199

### 57 58 200 **Association between Allostatic Load and Mortality among Females**

1  
2  
3 201 Over an average follow-up period of 3.9 years, 787 deaths (51.8%) occurred. A total of 477  
4  
5 202 females died (58.9%); the overall death rate was 161.3 per 1,000 person-years. The death rates  
6  
7 203 for females with an AL score of 0-1 (low burden), 2-4 (medium burden), and 5-9 (high burden)  
8  
9  
10 204 were 121.1, 174.8, and 252.6 per 1,000 person-years, respectively (Table 3).

11  
12 205

13  
14 206 In the unadjusted Cox model, per unit higher AL (modelled continuously) was significantly  
15  
16 207 associated with a 45% higher hazard of death among females (95% CI: 23%, 72%; Table 3).  
17  
18 208 However, the association attenuated and became insignificant after adjusting for socio-  
19  
20 209 demographics (age, sex, ethnicity, education, and marital status); similar results were observed  
21  
22 210 when smoking, exercise, and chronic conditions including pulmonary disease and arthritis were  
23  
24 211 additionally adjusted (HR = 1.16, 95% CI: 0.97, 1.38). When modelled in categories, the HR  
25  
26 212 was 1.44 (95% CI: 1.17, 1.79) and 2.11 (95% CI: 1.44, 3.10) for females with an AL score of  
27  
28 213 2-4 and 5-9, respectively, compared with those with a score of 0-1 in the unadjusted model.  
29  
30 214 After multivariable adjustment, females with an AL score of 2-4 and 5-9 had a 11% and 34%  
31  
32 215 higher hazard of death, although the associations were not significant. Results did not change  
33  
34 216 substantially in the sensitivity analyses (Tables S4).

35  
36  
37  
38 217

## 39 218 DISCUSSION

40  
41  
42 219 The present study aimed to explore the association between AL burden and all-cause mortality  
43  
44 220 among men and women aged at least 60 years in China. This finding is somewhat consistent  
45  
46 221 with previous evidence suggesting that AL may be predictor of all-cause mortality later in life  
47  
48 222 [7,19 ]. In addition, we found that older men with high AL burden had a more than two-fold  
49  
50 223 hazard of death than those with a low AL burden. There is no significant association observing  
51  
52 224 among females, but the findings are trending in the expected direction. These findings were in  
53  
54 225 line with previous studies showing men tend to have higher AL with higher risk of death than  
55  
56  
57  
58  
59  
60

1  
2  
3 226 women, and gender difference among AL score and cause-specific mortality risk including  
4  
5 227 infectious diseases, cardiometabolic disease, and malignant neoplasm [ 7, 30, 31]. One possible  
6  
7 228 explanation for the sex differences in the association between AL and mortality among older  
8  
9 229 adults is that older women might be less vulnerable to stress men due to sex differences in the  
10  
11 230 hippocampal formation in humans [32, 33, 34]. In addition, it has been shown that estrogen  
12  
13 231 plays an important role in the brain with the development of aging, aiming to maintain allostasis  
14  
15 232 when facing physiological stress, which may be possible to protect women against age-related  
16  
17 233 diseases [35,36,37]. Moreover, Gruenewald et al. (2006) stated that gender difference in  
18  
19 234 forecasting mortality risk among older people by biomarkers; compared with female,  
20  
21 235 neuroendocrine and immune related biomarkers were more predictive in males [38]. In addition,  
22  
23 236 the sex difference in the association between AL and mortality may be explained by behavioral  
24  
25 237 factors. Social support is effective in relieving stress [39]. Women are more socially active to  
26  
27 238 seek emotional support when facing stress than men [39]. Furthermore, in our study, women  
28  
29 239 had high mean age, less education, lower prevalence of smoking, and less exercise. Therefore,  
30  
31 240 adjustment of these covariates may influence the significant level of association in the final  
32  
33 241 model.  
34  
35  
36  
37  
38  
39  
40  
41

42 243 To our knowledge, our study was the first to reveal a significant association between AL and  
43  
44 244 mortality among male participants only. However, we need to interpret these results with  
45  
46 245 caution because the findings regarding the association between AL and mortality among  
47  
48 246 females were trending in the expected direction. A study with more female participants is  
49  
50 247 needed to provide a more definite conclusion. Previous study has identified increased risk of  
51  
52 248 all-cause mortality associated with increasing AL score in men [7]. We found that the strength  
53  
54 249 of the association differed between the present study and Hwang et al.'s work among men.  
55  
56 250 There are several plausible explanations for this discrepancy. First, the population in Hwang et  
57  
58  
59  
60

1  
2  
3 251 al.'s study ( $\geq 54$  years) was younger than ours ( $\geq 60$  years). Second, we did not include cortisol,  
4  
5 252 which is a commonly used indicator of the primary mediator stress, due to data unavailability.  
6  
7 253 Surrogate measures were used in the present study, which may lead to weaker associations.  
8  
9 254 Third, two studies used different cut-points for constructing the AL score. We used sex-specific  
10  
11 255 cut-off points for each biomarker, while general cut-points were used in Hwang et al.'s work.  
12  
13 256 Fourth, follow-up length was different between the two studies. Furthermore, different choices  
14  
15 257 of model covariates may influence the strength of observed associations. Hwang et al.'s  
16  
17 258 research only adjusted for age and sex.  
18  
19  
20  
21  
22  
23

24 260 For the sensitivity analysis of the association between AL and mortality, the overall magnitude  
25  
26 261 of the HR was not largely altered, and the association was still statically significant. This  
27  
28 262 suggests that the results of the association between AL category and mortality may not  
29  
30 263 influenced by the participants who were self-reported disease status, which may support that  
31  
32 264 our results are robust (Table S4).  
33  
34  
35  
36  
37

38 266 The AL was initially constructed using primary mediator stress including cortisol, epinephrine,  
39  
40 267 and norepinephrine. These biomarkers are not widely available and secondary responses of  
41  
42 268 cardiovascular, inflammatory and metabolic biomarkers such as CRP, BP and heart rate were  
43  
44 269 used as surrogate measures. Although multiple CVD risk factors were included, AL, in theory,  
45  
46 270 represents multisystem physiological dysregulation instead of functional decline in one system.  
47  
48 271 Previous studies showed that AL was able to stratify the risk of a wider range of health  
49  
50 272 outcomes than traditional CVD risk factors [4], it appears that AL could predict more health  
51  
52 273 information including CVD incident, decline of cognition function, decline of physical  
53  
54 274 function, and mortality than traditional CVD risk factors. The current study did not have data  
55  
56  
57  
58  
59  
60

1  
2  
3 275 on primary mediator of AL, so we did not conduct separate analysis to investigate the  
4  
5 276 association between primary vs. secondary mediators of AL and mortality.  
6  
7  
8 277

9  
10 278 This study has some strengths. This is among the first to investigate the association between  
11  
12 279 AL and mortality using a Chinese population. Moreover, our study used of CLHLS dataset that  
13  
14 280 is a large nationally representative old population survey in China. Furthermore, we updated  
15  
16 281 the quartile risk method for biomarkers BMI, total cholesterol, and triglyceride due to inversely  
17  
18 282 association with mortality among older adults, which may more truly reflect AL score in old  
19  
20 283 people. Additionally, our study added evidence to support sex differences in the association  
21  
22 284 between AL and the increased risk of mortality. Finally, sex-specific cut-off points were used  
23  
24 285 to construct the AL score may more truly reflect association between AL and mortality in  
25  
26 286 different gender compared to previous study. Additionally, we collected detailed covariates  
27  
28 287 information including age, sex, marital status, ethnicity, education, chronic diseases, which  
29  
30 288 enable us to adjust for a range of potential confounders in the final cox model.  
31  
32  
33  
34  
35  
36  
37

38 290 Despite these strengths, we acknowledge some limitations. First, we did not include any  
39  
40 291 primary neuroendocrine biomarkers such as cortisol in constructing the AL score due to data  
41  
42 292 unavailability; this might partially explain the null finding regarding the association between  
43  
44 293 AL and mortality among women. The cortisol biomarker plays an important role in responding  
45  
46 294 stress, which needs repeated measurements within 1-2 days which causes difficulties to  
47  
48 295 measure in large national survey [40]. Inclusion of cortisol biomarker maybe improve our  
49  
50 296 power of AL score predictions for mortality. Additionally, we classified AL biomarkers based  
51  
52 297 on sex-specific quartiles; however, these measures may vary over time, leading to  
53  
54 298 misclassification. Furthermore, there is huge loss to follow up (>20%; 552 of 2439), although  
55  
56 299 only 3 to 7-year range of follow up (2011 to 2014-18), which may underestimate the association.  
57  
58  
59  
60

1  
2  
3 300 Then, participants who provided blood sample in this study were residents in eight longevity  
4  
5 301 areas including Laizhou of Shandong Province, Xiayi of Henan Province, Zhongxiang of Hubei  
6  
7 302 Province, Mayang of Hunan Province, Sanshui of Guangdong Province, Yongfu of Guangxi  
8  
9 303 Autonomous Region, Chengmai of Hainan Province, Rudong of Jiangsu Province, which were  
10  
11 304 from 8 of 23 provinces, five autonomous regions, four municipalities, and two special  
12  
13 305 administrative regions. Therefore, our results may not be greatly generalizable to older adults  
14  
15 306 living in other regions of China. Lastly, it is important to notice that the sample was extremely  
16  
17 307 old, which may influence the magnitude of the association presented.  
18  
19  
20  
21  
22 308

23  
24 309 Therefore, even though we found that higher AL burden was associated with increased all-  
25  
26 310 cause mortality among Chinese men aged at least 60 years, but not women, it is really  
27  
28 311 recommended that these results need to be replicated in large longitudinal studies with longer  
29  
30 312 follow-up time, with more AL biomarkers such as cortisol, or with containing Chinese from  
31  
32 313 more regions apart from eight longevity areas. This would helpful for comparing with our  
33  
34 314 results and validating them in different populations.  
35  
36  
37  
38 315

## 39 40 316 CONCLUSION

41  
42 317 In conclusion, our study showed that higher AL burden was associated with increased all-cause  
43  
44 318 mortality among Chinese men aged at least 60 years. We did not find strong evidence among  
45  
46 319 women. Intervention programs targeting modifiable components of the AL burden may help  
47  
48 320 prolong lifespan for older adults, especially men, in China.  
49  
50  
51  
52 321  
53  
54 322  
55  
56  
57  
58  
59  
60

1  
2  
3 323 **Abbreviation:**  
4

5 324 AL: allostatic load; DHEA-S: dehydroepiandrosterone sulphate; BP: blood pressure; CLHLS:  
6  
7 325 Chinese Longitudinal Healthy Longevity Survey; SBP: systolic BP; DBP: diastolic BP; BMI:  
8  
9 326 body mass index; HDL: total cholesterol, high density lipoprotein; CRP: C-reactive protein.  
10  
11

12 327  
13

14 328 **DECLARATIONS:**  
15

16  
17 329 **Ethics approval and consent to participate:**  
18

19 330 The original CHARLS was approved by the Ethical Review Committee of Peking University.  
20

21 331 The baseline data collection was obtained from the Biomedical Ethics Review Committee of  
22

23 332 Peking University (IRB00001052-11015), and all participants have signed informed consent.  
24  
25

26 333  
27

28 334 **Consent to publish:**  
29

30 335 Not required  
31  
32

33 336  
34

35 337 **Availability of data and materials:**  
36

37 338 The raw data are available on website:  
38

39 339 <https://opendata.pku.edu.cn/dataset.xhtml?persistentId=doi:10.18170/DVN/WBO7LK>  
40  
41

42 340  
43

44 341 **Competing interests:**  
45

46 342 Authors have no conflict of interests to disclose.  
47  
48

49 343  
50

51 344 **Funding:**  
52

53 345 The research results of this article are sponsored partly by the Kunshan Municipal Government  
54  
55 346 research funding.  
56  
57

58 347  
59  
60



1  
2  
3 348 The funder played no role in study design, data collection, and analysis, the decision to publish,  
4  
5 349 or preparation of the manuscript.  
6  
7

8 350

9  
10 351 **Author Contributions:**

11  
12 352 THZ conceived of and conducted the data analyses, interpreted the findings, and wrote the  
13  
14 353 manuscript. LJY, HSC and HYJ contributed to manuscript revision. CKW contributed to  
15  
16 354 analysis and interpretation of data and drafting and revision of the manuscript.  
17  
18

19 355

20  
21 356 **Acknowledgements:**

22  
23 357 Not Applicable  
24  
25

26 358

27  
28 359 REFERENCE LIST:

- 29  
30 360 1. Beckie, Theresa M. "A systematic review of allostatic load, health, and health disparities."  
31  
32 361 Biological research for nursing. 2012; 14(4): 311-346.  
33  
34 362 2. Karlamangla, A. S., Singer, B. H., & Seeman, T. E. Reduction in allostatic load in older  
35  
36 363 adults is associated with lower all-cause mortality risk: MacArthur studies of successful  
37  
38 364 aging. Psychosomatic medicine. 2006; 68(3): 500-507.  
39  
40 365 3. Robertson, T., Beveridge, G., & Bromley, C. Allostatic load as a predictor of all-cause and  
41  
42 366 cause-specific mortality in the general population: evidence from the Scottish Health  
43  
44 367 Survey. PloS one. 2017; 12(8).  
45  
46 368 4. Seeman, T. E., McEwen, B. S., Rowe, J. W., & Singer, B. H. Allostatic load as a marker of  
47  
48 369 cumulative biological risk: MacArthur studies of successful aging. Proceedings of the  
49  
50 370 National Academy of Sciences. 2001; 98(8): 4770-4775.  
51  
52 371 5. Juster, R. P., McEwen, B. S., & Lupien, S. J. Allostatic load biomarkers of chronic stress  
53  
54 372 and impact on health and cognition. Neuroscience & Biobehavioral Reviews. 2010; 35(1):  
55  
56  
57  
58  
59  
60

- 1  
2  
3 373 2-16.  
4  
5  
6 374 6. Gruenewald, T. L., Seeman, T. E., Karlamangla, A. S., & Sarkisian, C. A. Allostatic load  
7  
8 375 and frailty in older adults. *Journal of the American Geriatrics Society*. 2009; 57(9): 1525-  
9  
10 376 1531.  
11  
12 377 7. Hwang, A. C. et al. Predicting all-cause and cause-specific mortality by static and dynamic  
13  
14 378 measurements of allostatic load: a 10-year population-based cohort study in Taiwan.  
15  
16 379 *Journal of the American Medical Directors Association*. 2014; 15(7): 490-496.  
17  
18 380 8. Karlamangla, A. S. et al. Allostatic load as a predictor of functional decline: MacArthur  
19  
20 381 studies of successful aging. *Journal of clinical epidemiology*. 2002; 55(7): 696-710.  
21  
22 382 9. Levine, M. E., & Crimmins, E. M. A comparison of methods for assessing mortality risk.  
23  
24 383 *American Journal of Human Biology*. 2014; 26(6): 768-776.  
25  
26 384 10. Seeman, T. et al. Modeling multisystem biological risk in young adults: the Coronary  
27  
28 385 Artery Risk Development in Young Adults Study. *American Journal of Human Biology:*  
29  
30 386 *The Official Journal of the Human Biology Association*. 2010; 22(4): 463-472.  
31  
32 387 11. Yang Y. Kozloski M. Sex differences in age trajectories of physiological dysregulation:  
33  
34 388 inflammation, metabolic syndrome, and allostatic load. *Journals of Gerontology Series A:*  
35  
36 389 *Biomedical Sciences and Medical Sciences*, 2011; 66(5), 493-500.  
37  
38 390 12. Tampubolon G, Maharani A. Trajectories of allostatic load among older Americans and  
39  
40 391 Britons: longitudinal cohort studies[J]. *BMC geriatrics*, 2018, 18(1): 255.  
41  
42 392 13. China Population (Age 60+): The 2019 Revision. 2019. Retrieved from  
43  
44 393 <https://population.un.org/wpp/Graphs/Probabilistic/POP/60plus/156> Accessed 22 Nov  
45  
46 394 2019.  
47  
48 395 14. China population. Worldometers. 2019. Retrieved from  
49  
50 396 <https://www.worldometers.info/world-population/china-population/> Accessed 22 Nov  
51  
52 397 2019.  
53  
54  
55  
56  
57  
58  
59  
60

- 1  
2  
3 398 15. Gu, D., & Dupre, M. E. Assessment of reliability of mortality and morbidity in the 1998–  
4  
5 399 2002 CLHLS waves. In *Healthy Longevity in China*. Springer, Dordrecht. 2008; 99-116.  
6  
7  
8 400 16. Yi, Z. Introduction to the chinese longitudinal healthy longevity survey (CLHLS). In  
9  
10 401 *Healthy longevity in China*. Springer, Dordrecht.2008a; 23-38  
11  
12 402 17. Yi, Z. Reliability of age reporting among the Chinese oldest-old in the CLHLS datasets. In  
13  
14 403 *Healthy Longevity in China*. Springer, Dordrecht. 2008b; 61-78.  
15  
16  
17 404 18. Zeng, Y., Poston, D. L., Vlosky, D. A., & Gu, D. (Eds.). (2008). *Healthy longevity in China:*  
18  
19 405 *demographic, socioeconomic, and psychological dimensions (Vol. 20)*. Springer Science  
20  
21 406 & Business Media.  
22  
23  
24 407 19. Borrell, L. N., Dallo, F. J., & Nguyen, N. Racial/ethnic disparities in all-cause mortality in  
25  
26 408 US adults: the effect of allostatic load. *Public health reports*, 2010; 125(6):810-816.  
27  
28  
29 409 20. Geronimus, A. T., Hicken, M., Keene, D., & Bound, J. “Weathering” and age patterns of  
30  
31 410 allostatic load scores among blacks and whites in the United States. *American journal of*  
32  
33 411 *public health*. 2006; 96(5): 826-833.  
34  
35  
36 412 21. Crimmins, E. M., Johnston, M., Hayward, M., & Seeman, T. Age differences in allostatic  
37  
38 413 load: an index of physiological dysregulation. *Experimental gerontology*. 2003; 38(7): 731-  
39  
40 414 734.  
41  
42  
43 415 22. Duong, M. T., Bingham, B. A., Aldana, P. C., Chung, S. T., & Sumner, A. E. Variation in  
44  
45 416 the calculation of allostatic load score: 21 examples from NHANES. *Journal of racial and*  
46  
47 417 *ethnic health disparities*. 2017; 4(3): 455-461.  
48  
49  
50 418 23. Lv, Y. B. et al. Triglycerides paradox among the oldest old: “the lower the better?”. *Journal*  
51  
52 419 *of the American Geriatrics Society*. 2019; 67(4): 741-748.  
53  
54 420 24. Winter, J. E., MacInnis, R. J., Wattanapenpaiboon, N., & Nowson, C. A. BMI and all-cause  
55  
56 421 mortality in older adults: a meta-analysis. *The American journal of clinical nutrition*. 2014;  
57  
58 422 99(4): 875-890.  
59  
60

- 1  
2  
3 423 25. Weverling-Rijnsburger, A. W. et al. Total cholesterol and risk of mortality in the oldest  
4  
5 424 old. *The Lancet*. 1997; 350(9085): 1119-1123.  
6  
7  
8 425 26. Sanna Read and Emily Grundy. Allostatic load and health in the older population of  
9  
10 426 England: a crossed-lagged analysis. *Psychosomatic medicine*, 76(7):490, 2014.  
11  
12 427 27. Castagné R, Garès V, Karimi M, et al. Allostatic load and subsequent all-cause mortality:  
13  
14 428 which biological markers drive the relationship? Findings from a UK birth cohort[J].  
15  
16 429 *European journal of epidemiology*, 2018, 33(5): 441-458.  
17  
18  
19 430 28. Zhu A, Yan L L, Wu C D, et al. Residential greenness, activities of daily living, and  
20  
21 431 instrumental activities of daily living: A longitudinal cohort study of older adults in  
22  
23 432 China[J]. *Environmental Epidemiology*, 2019, 3(5): e065.  
24  
25  
26 433 29. Ji J S, Zhu A, Bai C, et al. Residential greenness and mortality in oldest-old women and  
27  
28 434 men in China: a longitudinal cohort study[J]. *The Lancet*  
29  
30  
31 435 30. Seeman, T. E. et al. Social relationships, gender, and allostatic load across two age cohorts.  
32  
33 436 *Psychosomatic medicine*. 2002; 64(3): 395-406.  
34  
35  
36 437 31. Thomson, E. M., Kalayci, H., & Walker, M. Cumulative toll of exposure to stressors in  
37  
38 438 Canadians: An allostatic load profile. *Health Reports*. 2019; 30(6): 14-21.  
39  
40  
41 439 32. Gould, E., Westlind-Danielsson, A., Frankfurt, M., & McEwen, B. S. Sex differences and  
42  
43 440 thyroid hormone sensitivity of hippocampal pyramidal cells. *Journal of Neuroscience*.  
44  
45 441 1990; 10(3): 996-1003.  
46  
47  
48 442 33. Kimura, D. Sex differences in the brain. *Scientific American*. 1992; 267(3): 118-125.  
49  
50  
51 443 34. Paulson, P. E., Minoshima, S., Morrow, T. J., & Casey, K. L. Gender differences in pain  
52  
53 444 perception and patterns of cerebral activation during noxious heat stimulation in humans.  
54  
55 445 *Pain*. 1998; 76(1-2): 223-229.  
56  
57  
58 446 35. Borrás, C., Gambini, J., Gómez-Cabrera, M. C., Sastre, J., Pallardó, F. V., Mann, G. E., &  
59  
60 447 Viña, J. 17 $\beta$ -oestradiol up-regulates longevity-related, antioxidant enzyme expression via

- 1  
2  
3 448 the ERK1 and ERK2 [MAPK]/NFκB cascade. *Aging cell*; 2005; 4(3):113-118.  
4  
5  
6 449 36. Paulson, P. E., Minoshima, S., Morrow, T. J., & Casey, K. L. Gender differences in pain  
7  
8 450 perception and patterns of cerebral activation during noxious heat stimulation in humans.  
9  
10 451 *Pain*. 1998; 76(1-2): 223-229.  
11  
12 452 37. Vina, J. et al. Why females live longer than males: control of longevity by sex hormones.  
13  
14 453 *Science of aging knowledge environment: SAGE KE*. 2005;(23): pe17-pe17.  
15  
16  
17 454 38. Gruenewald, T. L., Seeman, T. E., Ryff, C. D., Karlamangla, A. S., & Singer, B. H.  
18  
19 455 Combinations of biomarkers predictive of later life mortality. *Proceedings of the National*  
20  
21 456 *Academy of Sciences*. 2006; 103(38): 14158-14163.  
22  
23  
24 457 39. Hamaideh, S. H. Gender differences in stressors and reactions to stressors among Jordanian  
25  
26 458 university students. *International Journal of Social Psychiatry*, 2012; 58(1), 26–33.  
27  
28  
29 459 40. Dowd, J. B., Simanek, A. M., & Aiello, A. E. Socio-economic status, cortisol and allostatic  
30  
31 460 load: a review of the literature. *International journal of epidemiology*. 2009;38(5): 1297-  
32  
33 461 1309.  
34  
35  
36 462

**Table 1.**

Cut-point for each of nine biomarkers used to construct allostatic load.

| <b>Biomarkers</b>                            | <b>Cut-points</b>        |                          |
|----------------------------------------------|--------------------------|--------------------------|
|                                              | <b>Male</b>              | <b>Female</b>            |
| Body mass index, kg/m <sup>2</sup>           | ≤19.33 kg/m <sup>2</sup> | ≤17.78 kg/m <sup>2</sup> |
| Glucose, mmol/L                              | ≥5.13 mmol/L             | ≥5.15 mmol/L             |
| Total cholesterol, mmol/L                    | ≤3.51 mmol/L             | ≤3.71 mmol/L             |
| High-density lipoprotein cholesterol, mmol/L | ≤1.04 mmol/L             | ≤1.06 mmol/L             |
| Triglyceride, mmol/L                         | ≤0.56 mmol/L             | ≤0.63 mmol/L             |
| High-sensitive C reactive protein, mg/L      | ≥2.44 mg/L               | ≥2.33 mg/L               |
| Heart rate, beats/min                        | ≥80 beats/min            | ≥83 beats/min            |
| Systolic blood pressure, mmHg                | ≥150 mmHg                | ≥160 mmHg                |
| Diastolic blood pressure, mmHg               | ≥90 mmHg                 | ≥90 mmHg                 |

High-risk group was defined as below the sex-specific 25th percentile for body mass index, total cholesterol, high-density lipoprotein cholesterol and triglyceride. High-risk group was defined as above the sex-specific 75th percentile for glucose, high-sensitive C reactive protein, heart rate, systolic blood pressure, and diastolic blood pressure.

**Table 2.**  
Baseline characteristics by allostatic load burden (low, medium, and high) among males and females.

|                        | Male (N=709) |                |                   |                |         | Female (N=810) |                |                   |                |         |
|------------------------|--------------|----------------|-------------------|----------------|---------|----------------|----------------|-------------------|----------------|---------|
|                        | Total        | Low<br>(n=181) | Medium<br>(n=455) | High<br>(n=73) | P-value | Total          | Low<br>(n=231) | Medium<br>(n=534) | High<br>(n=45) | P-value |
| Age, years, mean±SD    | 80.5±11.3    | 77.6±10.7      | 81.0±11.4         | 84.1±11.0      | 0.042   | 90.2±11.8      | 87.0±13.0      | 91.3±11.1         | 93.6±11.0      | 0.029   |
| Married, No. (%)       | 446 (62.9%)  | 125 (69.1%)    | 276 (60.7%)       | 45 (61.6%)     | 0.137   | 173 (21.4%)    | 65 (28.1%)     | 101 (18.9%)       | 7 (15.6%)      | 0.010   |
| Han ethnicity, No. (%) | 638 (89.9%)  | 168 (92.8%)    | 402 (88.4%)       | 68 (93.2%)     | 0.152   | 719 (88.8%)    | 210 (90.9%)    | 471 (88.2%)       | 38 (84.4%)     | 0.354   |
| Any education, No. (%) | 457 (64.5%)  | 119 (65.8%)    | 294 (64.6%)       | 44 (60.3%)     | 0.707   | 108 (13.3%)    | 50 (21.7%)     | 55 (10.3%)        | 3 (6.7%)       | 0.000   |
| Smoking, No. (%)       |              |                |                   |                | 0.418   |                |                |                   |                | 0.800   |
| Current Smoker         | 265 (37.3%)  | 71 (39.2%)     | 170 (37.4%)       | 24 (32.9%)     |         | 30 (3.7%)      | 6 (2.6%)       | 23 (4.3%)         | 1 (2.2%)       |         |
| Past Smoker            | 109 (15.4%)  | 22 (12.2%)     | 71 (15.6%)        | 16 (21.9%)     |         | 16 (2.0%)      | 5 (2.2%)       | 11 (2.1%)         | 0              |         |
| Non-smoker             | 335 (47.3%)  | 88 (48.6%)     | 214 (47.0%)       | 33 (45.2%)     |         | 761 (94.3%)    | 219 (95.2%)    | 498 (93.6%)       | 44 (97.8%)     |         |
| Exercise, No. (%)      | 183 (26.2%)  | 55 (30.6%)     | 110 (24.6%)       | 18 (25.0%)     | 0.300   | 154 (19.3%)    | 41 (18.1%)     | 103 (19.5%)       | 10 (22.2%)     | 0.782   |
| Hypertension, No. (%)  | 125 (17.8%)  | 0              | 97 (21.6%)        | 28 (38.9%)     | 0.000   | 179 (22.6%)    | 0              | 153 (29.3%)       | 26 (57.8%)     | 0.000   |
| Diabetes, No. (%)      | 13 (1.8%)    | 3 (1.6%)       | 4 (0.9%)          | 6 (8.3%)       | 0.001   | 12 (1.5%)      | 0              | 10 (1.9%)         | 2 (4.4%)       | 0.013   |
| Heart disease, No. (%) | 42 (5.9%)    | 10 (5.5%)      | 27 (6.0%)         | 5 (6.9%)       | 0.921   | 62 (7.8%)      | 10 (4.5%)      | 40 (7.6%)         | 12 (26.7%)     | 0.000   |
| Stroke, No. (%)        | 33 (4.7%)    | 8 (4.4%)       | 18 (4.0%)         | 7 (10.0%)      | 0.105   | 45 (5.7%)      | 14 (6.2%)      | 29 (5.5%)         | 2 (4.4%)       | 0.878   |
| Pulmonary, No. (%)     | 74 (10.5%)   | 18 (10.0%)     | 45 (9.9%)         | 11 (15.3%)     | 0.374   | 49 (6.2%)      | 10 (4.4%)      | 38 (7.2%)         | 1 (2.2%)       | 0.181   |
| Arthritis, No. (%)     | 96 (13.6%)   | 18 (10.0%)     | 64 (14.2%)        | 14 (19.2%)     | 0.132   | 128 (16.0%)    | 44 (19.2%)     | 79 (15.0%)        | 5 (11.1%)      | 0.224   |
| Cancer, No. (%)        | 2 (0.3%)     | 1 (0.6%)       | 1 (0.2%)          | 0              | 0.591   | 6 (0.8%)       | 0              | 5 (1.0%)          | 1 (2.2%)       | 0.133   |

<sup>a</sup>Married vs. widowed, never married, and divorce.

**Table 3.**

Association between allostatic load and mortality among males and females.

| <b>Males (N = 709)</b>        |                      |                       |                                       |                             |
|-------------------------------|----------------------|-----------------------|---------------------------------------|-----------------------------|
|                               |                      | Unadjusted            | Demographically adjusted <sup>a</sup> | Fully adjusted <sup>b</sup> |
| Events per 1,000 PYs (95% CI) |                      | Hazard ratio (95% CI) |                                       |                             |
| AL (continuously)             |                      | 1.75 (1.44, 2.12)     | 1.51 (1.24, 1.84)                     | 1.51 (1.23, 1.84)           |
| AL category                   |                      |                       |                                       |                             |
| Low (0-1)                     | 66.1 (50.7, 86.1)    | Ref.                  | Ref.                                  | Ref.                        |
| Medium (2-4)                  | 110.4 (96.3, 126.7)  | 1.68 (1.24, 2.26)     | 1.36 (1.00, 1.83)                     | 1.33 (0.98, 1.80)           |
| High (5-9)                    | 201.3 (153.0, 265.0) | 3.06 (2.09, 4.48)     | 2.29 (1.56, 3.37)                     | 2.18 (1.48, 3.22)           |
| <b>Females (N = 810)</b>      |                      |                       |                                       |                             |
|                               |                      | Unadjusted            | Demographically adjusted <sup>a</sup> | Fully adjusted <sup>b</sup> |
| Events per 1,000 PYs (95% CI) |                      | Hazard ratio (95% CI) |                                       |                             |
| AL (continuously)             |                      | 1.45 (1.23, 1.72)     | 1.16 (0.97, 1.37)                     | 1.16 (0.97, 1.38)           |
| AL category                   |                      |                       |                                       |                             |
| Low (0-1)                     | 121.1 (100.7, 145.6) | Ref.                  | Ref.                                  | Ref.                        |
| Medium (2-4)                  | 174.8 (156.9, 194.7) | 1.44 (1.17, 1.79)     | 1.14 (0.92, 1.42)                     | 1.11 (0.89, 1.38)           |
| High (5-9)                    | 252.6 (180.5, 353.5) | 2.11 (1.44, 3.10)     | 1.36 (0.93, 2.01)                     | 1.34 (0.91, 1.97)           |

Abbreviations: PY, person-year; CI, confidence interval; AL, allostatic load.

<sup>a</sup>Demographically adjusted model included age, ethnicity (Han vs. minority), education (any vs. none), and marital status (married vs. others).<sup>b</sup>Fully adjusted model included age, ethnicity (Han vs. minority), education (any vs. none), and marital status (married vs. others), smoking (current vs. previous or non-smoke), exercise (yes vs. no), and chronic diseases such as pulmonary disease and arthritis.



Figure 1. Distribution of sample size by allostatic load score among males and females.

For peer review only

1  
2  
3  
4  
5  
6  
7  
8  
9  
10  
11  
12  
13  
14  
15  
16  
17  
18  
19  
20  
21  
22  
23  
24  
25  
26  
27  
28  
29  
30  
31  
32  
33  
34  
35  
36  
37  
38  
39  
40  
41  
42  
43  
44  
45  
46  
47  
48  
49  
50  
51  
52  
53  
54  
55  
56  
57  
58  
59  
60

**Figure 1.**

Distribution of sample size by allostatic load score among males and females.

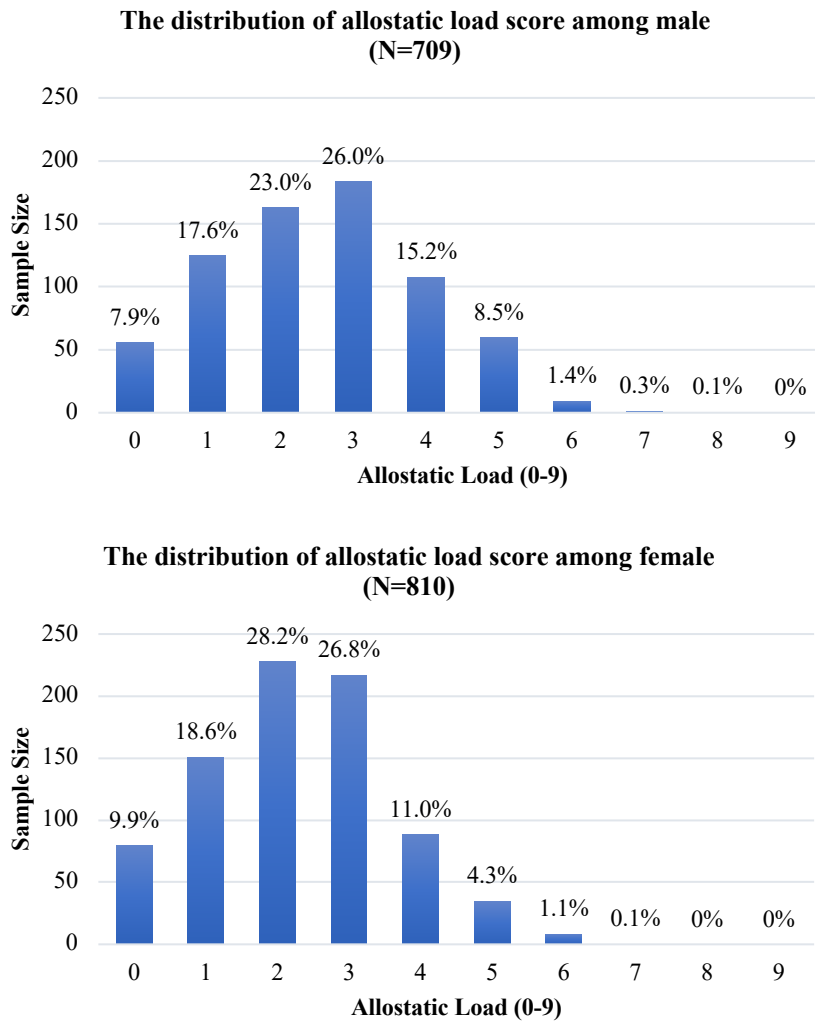

The above figure is the distribution of allostatic load score among male. The below figure is the distribution of allostatic load score among female. The distribution of the AL score (range: 0-9) is right skewed for both males and females; only 13 (1.8%) males and 10 (1.2%) females had a score of 6-9, respectively.

**Table S1.** The cut-points for excluding SBP, DBP, BMI, and heart rate.

| <b>Biomarkers</b>                  | <b>Cut-points</b> |
|------------------------------------|-------------------|
| Body mass index, kg/m <sup>2</sup> | >40               |
| Heart rate, beats/min              | >220              |
| Systolic blood pressure, mmHg      | >200 or <90       |
| Diastolic blood pressure, mmHg     | >110 or <60       |

For peer review only

**Table S2.** Baseline characteristics between included and excluded participants.

| Characteristics                | Included<br>(N=1,519) | Excluded <sup>b</sup><br>(N=920) | P-value |
|--------------------------------|-----------------------|----------------------------------|---------|
| Age, years, mean±SD            | 85.6±12.6             | 85.6± 13.5                       | 0.523   |
| Married <sup>a</sup> , No. (%) | 619 (40.8%)           | 361 (39.2%)                      | 0.461   |
| Han ethnicity, No. (%)         | 1,357 (89.3%)         | 836 (90.9%)                      | 0.223   |
| Any education, No. (%)         | 565 (37.2%)           | 384 (41.7%)                      | 0.026   |
| Smoking, No. (%)               |                       |                                  |         |
| Current Smoker                 | 295 (19.5%)           | 170 (18.7%)                      | 0.460   |
| Past Smoker                    | 125 (8.3%)            | 88 (9.7%)                        |         |
| Non-smoker                     | 1,096 (72.3%)         | 650 (71.6%)                      |         |
| Exercise, No. (%)              | 337 (22.5%)           | 271 (30.2%)                      | 0.000   |
| Hypertension, No. (%)          | 304 (20.3%)           | 201 (22.8%)                      | 0.153   |
| Diabetes, No. (%)              | 25 (1.7%)             | 19 (2.1%)                        | 0.405   |
| Heart disease, No. (%)         | 104 (6.9%)            | 48 (5.4%)                        | 0.138   |
| Stroke, No. (%)                | 78 (5.2%)             | 62 (6.9%)                        | 0.077   |
| Pulmonary, No. (%)             | 123 (8.2%)            | 73 (8.2%)                        | 0.994   |
| Arthritis, No. (%)             | 224 (14.9%)           | 152 (17.1%)                      | 0.145   |
| Cancer, No. (%)                | 8 (0.5%)              | 3 (0.3%)                         | 0.341   |

<sup>a</sup>Married vs. widowed, never married, and divorced.

<sup>b</sup>Excluded criteria includes incomplete data on AL biomarkers, no follow-up data, missing data or extreme values of the biomarkers, and aged less than 60 years.

**Table S3.** Compare participant who lost follow up data and who included in study.

| <b>Characteristics</b>         | <b>Included<br/>(N=1,519)</b> | <b>Loss follow up<br/>(N=522)</b> | <b>P-value</b> |
|--------------------------------|-------------------------------|-----------------------------------|----------------|
| Age, years, mean±SD            | 85.6±12.6                     | 87.3± 13.3                        | 0.98           |
| Married <sup>a</sup> , No. (%) | 619 (40.8%)                   | 180 (34.8%)                       | 0.02           |
| Han ethnicity, No. (%)         | 1,357 (89.3%)                 | 467 (90.2%)                       | 0.60           |
| Any education, No. (%)         | 565 (37.2%)                   | 202 (39.0%)                       | 0.47           |
| Smoking, No. (%)               |                               |                                   |                |
| Current Smoker                 | 295 (19.5%)                   | 88 (17.3%)                        | 0.54           |
| Past Smoker                    | 125 (8.3%)                    | 45 (8.8%)                         |                |
| Non-smoker                     | 1,096 (72.3%)                 | 376 (73.9%)                       |                |
| Exercise, No. (%)              | 337 (22.5%)                   | 129 (25.6%)                       | 0.15           |
| Hypertension, No. (%)          | 304 (20.3%)                   | 109 (21.9%)                       | 0.45           |
| Diabetes, No. (%)              | 25 (1.7%)                     | 7 (1.4%)                          | 0.68           |
| Heart disease, No. (%)         | 104 (6.9%)                    | 25 (5.0%)                         | 0.13           |
| Stroke, No. (%)                | 78 (5.2%)                     | 44 (8.8%)                         | 0.004          |
| Pulmonary, No. (%)             | 123 (8.2%)                    | 39 (7.7%)                         | 0.77           |
| Arthritis, No. (%)             | 224 (14.9%)                   | 79 (15.8%)                        | 0.62           |
| Cancer, No. (%)                | 8 (0.5%)                      | 2 (0.4%)                          | 0.72           |

<sup>a</sup>Married vs. widowed, never married, and divorced.

**Table S4.** Sensitivity analysis.

| <b>Males (N = 709)</b>        |                      |                       |                                       |                             |
|-------------------------------|----------------------|-----------------------|---------------------------------------|-----------------------------|
| Events per 1,000 PYs (95% CI) |                      | Unadjusted            | Demographically adjusted <sup>a</sup> | Fully adjusted <sup>b</sup> |
|                               |                      | Hazard ratio (95% CI) |                                       |                             |
| AL (continuously)             |                      | 1.28 (1.18, 1.38)     | 1.18 (1.09, 1.28)                     | 1.18 (1.08, 1.27)           |
| AL category                   |                      |                       |                                       |                             |
| Low (0-1)                     | 68.1 (53.4, 86.9)    | Ref.                  | Ref.                                  | Ref.                        |
| Medium (2-4)                  | 115.4 (100.7, 132.1) | 1.70 (1.29, 2.25)     | 1.45 (1.10, 1.93)                     | 1.41 (1.06, 1.88)           |
| High (5-9)                    | 214.7 (154.8, 297.6) | 3.18 (2.11, 4.78)     | 2.33 (1.54, 3.53)                     | 2.35 (1.55, 3.56)           |
| <b>Females (N = 810)</b>      |                      |                       |                                       |                             |
| Events per 1,000 PYs (95% CI) |                      | Unadjusted            | Demographically adjusted <sup>a</sup> | Fully adjusted <sup>b</sup> |
|                               |                      | Hazard ratio (95% CI) |                                       |                             |
| AL (continuously)             |                      | 1.22 (1.14, 1.31)     | 1.10 (1.02, 1.18)                     | 1.09 (1.01, 1.17)           |
| AL category                   |                      |                       |                                       |                             |
| Low (0-1)                     | 113.7 (96.2, 134.4)  | Ref.                  | Ref.                                  | Ref.                        |
| Medium (2-4)                  | 191.7 (171.8, 213.9) | 1.70 (1.39, 2.08)     | 1.29 (1.05, 1.57)                     | 1.27 (1.03, 1.56)           |
| High (5-9)                    | 267.4 (168.5, 424.5) | 2.40 (1.47, 3.93)     | 1.37 (0.83, 2.25)                     | 1.39 (0.85, 2.29)           |

Abbreviations: PY, person-year; CI, confidence interval; AL, allostatic load.

<sup>a</sup>Demographically adjusted model included age, ethnicity (Han vs. minority), education (any vs. none), and marital status (married vs. others).

<sup>b</sup>Fully adjusted model included age, ethnicity (Han vs. minority), education (any vs. none), and marital status (married vs. others), smoking (current vs. previous or non-smoke), exercise (yes vs. no), and chronic diseases such as pulmonary disease and arthritis.

1  
2  
3  
4  
5  
6  
7  
8  
9  
10  
11  
12  
13  
14  
15  
16  
17  
18  
19  
20  
21  
22  
23  
24  
25  
26  
27  
28  
29  
30  
31  
32  
33  
34  
35  
36  
37  
38  
39  
40  
41  
42  
43  
44  
45  
46  
47  
48  
49  
50  
51  
52  
53  
54  
55  
56  
57  
58  
59  
60

For peer review only

zSTROBE Statement—Checklist of items that should be included in reports of *cohort studies*

|                              | Item No | Recommendation                                                                                                                                                                                                                                                                                                         | Page No |
|------------------------------|---------|------------------------------------------------------------------------------------------------------------------------------------------------------------------------------------------------------------------------------------------------------------------------------------------------------------------------|---------|
| <b>Title and abstract</b>    | 1       | (a) Indicate the study's design with a commonly used term in the title or the abstract<br>(b) Provide in the abstract an informative and balanced summary of what was done and what was found                                                                                                                          | 1-2     |
| <b>Introduction</b>          |         |                                                                                                                                                                                                                                                                                                                        |         |
| Background/rationale         | 2       | Explain the scientific background and rationale for the investigation being reported                                                                                                                                                                                                                                   | 4       |
| Objectives                   | 3       | State specific objectives, including any prespecified hypotheses                                                                                                                                                                                                                                                       | 5       |
| <b>Methods</b>               |         |                                                                                                                                                                                                                                                                                                                        |         |
| Study design                 | 4       | Present key elements of study design early in the paper                                                                                                                                                                                                                                                                | 5-6     |
| Setting                      | 5       | Describe the setting, locations, and relevant dates, including periods of recruitment, exposure, follow-up, and data collection                                                                                                                                                                                        | 6       |
| Participants                 | 6       | (a) Give the eligibility criteria, and the sources and methods of selection of participants. Describe methods of follow-up<br>(b) For matched studies, give matching criteria and number of exposed and unexposed                                                                                                      | 6-7     |
| Variables                    | 7       | Clearly define all outcomes, exposures, predictors, potential confounders, and effect modifiers. Give diagnostic criteria, if applicable                                                                                                                                                                               | 7-9     |
| Data sources/<br>measurement | 8*      | For each variable of interest, give sources of data and details of methods of assessment (measurement). Describe comparability of assessment methods if there is more than one group                                                                                                                                   | 7-9     |
| Bias                         | 9       | Describe any efforts to address potential sources of bias                                                                                                                                                                                                                                                              | 7       |
| Study size                   | 10      | Explain how the study size was arrived at                                                                                                                                                                                                                                                                              | 6       |
| Quantitative variables       | 11      | Explain how quantitative variables were handled in the analyses. If applicable, describe which groupings were chosen and why                                                                                                                                                                                           | 7-9     |
| Statistical methods          | 12      | (a) Describe all statistical methods, including those used to control for confounding<br>(b) Describe any methods used to examine subgroups and interactions<br>(c) Explain how missing data were addressed<br>(d) If applicable, explain how loss to follow-up was addressed<br>(e) Describe any sensitivity analyses | 9       |
| <b>Results</b>               |         |                                                                                                                                                                                                                                                                                                                        |         |
| Participants                 | 13*     | (a) Report numbers of individuals at each stage of study—eg numbers potentially eligible, examined for eligibility, confirmed eligible, included in the study, completing follow-up, and analysed<br>(b) Give reasons for non-participation at each stage<br>(c) Consider use of a flow diagram                        | 10      |
| Descriptive data             | 14*     | (a) Give characteristics of study participants (eg demographic, clinical, social) and information on exposures and potential confounders<br>(b) Indicate number of participants with missing data for each variable of interest<br>(c) Summarise follow-up time (eg, average and total amount)                         | 10      |
| Outcome data                 | 15*     | Report numbers of outcome events or summary measures over time                                                                                                                                                                                                                                                         | 11-12   |



|    |                          |    |                                                                                                                                                                                                              |       |
|----|--------------------------|----|--------------------------------------------------------------------------------------------------------------------------------------------------------------------------------------------------------------|-------|
| 1  | Main results             | 16 | (a) Give unadjusted estimates and, if applicable, confounder-adjusted estimates and their precision (eg, 95% confidence interval). Make clear which confounders were adjusted for and why they were included | 11-12 |
| 2  |                          |    | (b) Report category boundaries when continuous variables were categorized                                                                                                                                    |       |
| 3  |                          |    | (c) If relevant, consider translating estimates of relative risk into absolute risk for a meaningful time period                                                                                             |       |
| 4  |                          |    |                                                                                                                                                                                                              |       |
| 5  |                          |    |                                                                                                                                                                                                              |       |
| 6  |                          |    |                                                                                                                                                                                                              |       |
| 7  |                          |    |                                                                                                                                                                                                              |       |
| 8  |                          |    |                                                                                                                                                                                                              |       |
| 9  | Other analyses           | 17 | Report other analyses done—eg analyses of subgroups and interactions, and sensitivity analyses                                                                                                               | 11-12 |
| 10 |                          |    |                                                                                                                                                                                                              |       |
| 11 | <b>Discussion</b>        |    |                                                                                                                                                                                                              |       |
| 12 |                          |    |                                                                                                                                                                                                              |       |
| 13 | Key results              | 18 | Summarise key results with reference to study objectives                                                                                                                                                     | 12    |
| 14 | Limitations              | 19 | Discuss limitations of the study, taking into account sources of potential bias or imprecision. Discuss both direction and magnitude of any potential bias                                                   | 15    |
| 15 |                          |    |                                                                                                                                                                                                              |       |
| 16 | Interpretation           | 20 | Give a cautious overall interpretation of results considering objectives, limitations, multiplicity of analyses, results from similar studies, and other relevant evidence                                   | 12-14 |
| 17 |                          |    |                                                                                                                                                                                                              |       |
| 18 |                          |    |                                                                                                                                                                                                              |       |
| 19 | Generalisability         | 21 | Discuss the generalisability (external validity) of the study results                                                                                                                                        | 15    |
| 20 |                          |    |                                                                                                                                                                                                              |       |
| 21 | <b>Other information</b> |    |                                                                                                                                                                                                              |       |
| 22 | Funding                  | 22 | Give the source of funding and the role of the funders for the present study and, if applicable, for the original study on which the present article is based                                                | 17-18 |
| 23 |                          |    |                                                                                                                                                                                                              |       |
| 24 |                          |    |                                                                                                                                                                                                              |       |
| 25 |                          |    |                                                                                                                                                                                                              |       |

\*Give information separately for exposed and unexposed groups.

**Note:** An Explanation and Elaboration article discusses each checklist item and gives methodological background and published examples of transparent reporting. The STROBE checklist is best used in conjunction with this article (freely available on the Web sites of PLoS Medicine at <http://www.plosmedicine.org/>, Annals of Internal Medicine at <http://www.annals.org/>, and Epidemiology at <http://www.epidem.com/>). Information on the STROBE Initiative is available at <http://www.strobe-statement.org>.
