# Supplementary material for: Association between allostatic load and mortality among Chinese older adults: the Chinese Longitudinal Health and Longevity Study
Source: PubMed Central journal article supplement — BMJ Open. 2021 Aug 3;11(8):e045369. doi: 10.1136/bmjopen-2020-045369 (PMC8336121; doi:10.1136/bmjopen-2020-045369), 2021-08-03
Supplement: bmjopen-2020-045369supp001.pdf [file bmjopen-2020-045369supp001.pdf]

**Table S1.** The cut-points for excluding SBP, DBP, BMI, and heart rate.

| <b>Biomarkers</b>                  | <b>Cut-points</b> |
|------------------------------------|-------------------|
| Body mass index, kg/m <sup>2</sup> | >40               |
| Heart rate, beats/min              | >220              |
| Systolic blood pressure, mmHg      | >200 or <90       |
| Diastolic blood pressure, mmHg     | >110 or <60       |

**Table S2.** Baseline characteristics between included and excluded participants.

| Characteristics                | Included<br>(N=1,519) | Excluded <sup>b</sup><br>(N=920) | P-value |
|--------------------------------|-----------------------|----------------------------------|---------|
| Age, years, mean±SD            | 85.6±12.6             | 85.6± 13.5                       | 0.523   |
| Married <sup>a</sup> , No. (%) | 619 (40.8%)           | 361 (39.2%)                      | 0.461   |
| Han ethnicity, No. (%)         | 1,357 (89.3%)         | 836 (90.9%)                      | 0.223   |
| Any education, No. (%)         | 565 (37.2%)           | 384 (41.7%)                      | 0.026   |
| Smoking, No. (%)               |                       |                                  |         |
| Current Smoker                 | 295 (19.5%)           | 170 (18.7%)                      | 0.460   |
| Past Smoker                    | 125 (8.3%)            | 88 (9.7%)                        |         |
| Non-smoker                     | 1,096 (72.3%)         | 650 (71.6%)                      |         |
| Exercise, No. (%)              | 337 (22.5%)           | 271 (30.2%)                      | 0.000   |
| Hypertension, No. (%)          | 304 (20.3%)           | 201 (22.8%)                      | 0.153   |
| Diabetes, No. (%)              | 25 (1.7%)             | 19 (2.1%)                        | 0.405   |
| Heart disease, No. (%)         | 104 (6.9%)            | 48 (5.4%)                        | 0.138   |
| Stroke, No. (%)                | 78 (5.2%)             | 62 (6.9%)                        | 0.077   |
| Pulmonary, No. (%)             | 123 (8.2%)            | 73 (8.2%)                        | 0.994   |
| Arthritis, No. (%)             | 224 (14.9%)           | 152 (17.1%)                      | 0.145   |
| Cancer, No. (%)                | 8 (0.5%)              | 3 (0.3%)                         | 0.341   |

<sup>a</sup>Married vs. widowed, never married, and divorced.

<sup>b</sup>Excluded criteria includes incomplete data on AL biomarkers, no follow-up data, missing data or extreme values of the biomarkers, and aged less than 60 years.

**Table S3.** Compare participant who lost follow up data and who included in study.

| Characteristics                | Included<br>(N=1,519) | Loss follow up<br>(N=522) | P-value |
|--------------------------------|-----------------------|---------------------------|---------|
| Age, years, mean±SD            | 85.6±12.6             | 87.3± 13.3                | 0.98    |
| Married <sup>a</sup> , No. (%) | 619 (40.8%)           | 180 (34.8%)               | 0.02    |
| Han ethnicity, No. (%)         | 1,357 (89.3%)         | 467 (90.2%)               | 0.60    |
| Any education, No. (%)         | 565 (37.2%)           | 202 (39.0%)               | 0.47    |
| Smoking, No. (%)               |                       |                           |         |
| Current Smoker                 | 295 (19.5%)           | 88 (17.3%)                | 0.54    |
| Past Smoker                    | 125 (8.3%)            | 45 (8.8%)                 |         |
| Non-smoker                     | 1,096 (72.3%)         | 376 (73.9%)               |         |
| Exercise, No. (%)              | 337 (22.5%)           | 129 (25.6%)               | 0.15    |
| Hypertension, No. (%)          | 304 (20.3%)           | 109 (21.9%)               | 0.45    |
| Diabetes, No. (%)              | 25 (1.7%)             | 7 (1.4%)                  | 0.68    |
| Heart disease, No. (%)         | 104 (6.9%)            | 25 (5.0%)                 | 0.13    |
| Stroke, No. (%)                | 78 (5.2%)             | 44 (8.8%)                 | 0.004   |
| Pulmonary, No. (%)             | 123 (8.2%)            | 39 (7.7%)                 | 0.77    |
| Arthritis, No. (%)             | 224 (14.9%)           | 79 (15.8%)                | 0.62    |
| Cancer, No. (%)                | 8 (0.5%)              | 2 (0.4%)                  | 0.72    |

<sup>a</sup>Married vs. widowed, never married, and divorced.

**Table S4.** Sensitivity analysis.

| <b>Males (N = 709)</b>   |                               |                       |                                       |                             |
|--------------------------|-------------------------------|-----------------------|---------------------------------------|-----------------------------|
|                          | Events per 1,000 PYs (95% CI) | Unadjusted            | Demographically adjusted <sup>a</sup> | Fully adjusted <sup>b</sup> |
|                          |                               | Hazard ratio (95% CI) |                                       |                             |
| AL (continuously)        |                               | 1.28 (1.18, 1.38)     | 1.18 (1.09, 1.28)                     | 1.18 (1.08, 1.27)           |
| AL category              |                               |                       |                                       |                             |
| Low (0-1)                | 68.1 (53.4, 86.9)             | Ref.                  | Ref.                                  | Ref.                        |
| Medium (2-4)             | 115.4 (100.7, 132.1)          | 1.70 (1.29, 2.25)     | 1.45 (1.10, 1.93)                     | 1.41 (1.06, 1.88)           |
| High (5-9)               | 214.7 (154.8, 297.6)          | 3.18 (2.11, 4.78)     | 2.33 (1.54, 3.53)                     | 2.35 (1.55, 3.56)           |
| <b>Females (N = 810)</b> |                               |                       |                                       |                             |
|                          | Events per 1,000 PYs (95% CI) | Unadjusted            | Demographically adjusted <sup>a</sup> | Fully adjusted <sup>b</sup> |
|                          |                               | Hazard ratio (95% CI) |                                       |                             |
| AL (continuously)        |                               | 1.22 (1.14, 1.31)     | 1.10 (1.02, 1.18)                     | 1.09 (1.01, 1.17)           |
| AL category              |                               |                       |                                       |                             |
| Low (0-1)                | 113.7 (96.2, 134.4)           | Ref.                  | Ref.                                  | Ref.                        |
| Medium (2-4)             | 191.7 (171.8, 213.9)          | 1.70 (1.39, 2.08)     | 1.29 (1.05, 1.57)                     | 1.27 (1.03, 1.56)           |
| High (5-9)               | 267.4 (168.5, 424.5)          | 2.40 (1.47, 3.93)     | 1.37 (0.83, 2.25)                     | 1.39 (0.85, 2.29)           |

Abbreviations: PY, person-year; CI, confidence interval; AL, allostatic load.

<sup>a</sup>Demographically adjusted model included age, ethnicity (Han vs. minority), education (any vs. none), and marital status (married vs. others).

<sup>b</sup>Fully adjusted model included age, ethnicity (Han vs. minority), education (any vs. none), and marital status (married vs. others), smoking (current vs. previous or non-smoke), exercise (yes vs. no), and chronic diseases such as pulmonary disease and arthritis.
